# Supplementary material for: Characterization of the adsorption site energies and heterogeneous surfaces of porous materials
Source: Royal Society of Chemistry journal article supplement (doi:10.1039/c9ta00287a), 2019-01-01
Supplement: c9ta00287a1.xlsx [file c9ta00287a1.xlsx]

## Sheet: Langmuir-Fruendlich(Numerical)
This worksheet will help to obtain the site energy distribution spectra of porous materials based on the adsorption isotherm parameters obtained from aLangmuir-Freundlich isotherm
Model isotherm: Langmuir-Freundlich Isotherm												.(1)	binding affinity; this is just the inverse of the range of equilibirium concentration of interest
The Langmuir-Freundlich isotherm constants includes (qm, b and n)												.(2)	Experimentally obtained equilibirium concentration
												.(3)	amount adsorbed according to a langmuir-freundlich isotherm, qh is predicted as a function of Ce
												.(4)	amount adsorbed according to a langmuir-freundlich isotherm, qh is predicted as a function of a*Ce, instead of C3e; so Ce is replaced by a number which is a product of Ce and 'a'
												.(5)	amount adsorbed according to a langmuir-freundlich isotherm, qh is predicted as a function of Ce/a, instead of C3e; so Ce is replaced by a number which is a product of Ce/a
	qm	30.8		a/(a-10^2	6							.(6)	amount adsorbed according to a langmuir-freundlich isotherm, qh is predicted as a function of a^2*Ce, instead of Ce; so Ce is replaced by a number which is a product of a^2*Ce
	b	0.6		a	1.5	this is correct, i checked it multiple times						.(7)	amount adsorbed according to a langmuir-freundlich isotherm, qh is predicted as a function of Ce/a^2, instead of Ce; so Ce is replaced by a number which is a product of Ce/a^2
	n	0.9										.(11)	the determined site energy distribution spectra according the numerical function shown below
		The isotherm constants in cell c8-c10 can be determined using a non-linear regression analysis using excel or any other similar softwares
.(1)	.(2)	.(3)	.(4)	.(5)	.(6)	.(7)	.(8)	.(9)	.(10)	.(11)
1/ce	Ce	qh	qh(aCe)	qh(Ce/a)	qh(a^2*Ce))	qh(Ce/a^2)				N(K)
#DIV/0!	0	0	0	0	0	0	0	0	0	0		Note: This worksheet shows model calculations to obtain site energy distribution spectra shown in graph below from LF isotherm
10	0.1	2.15517	3.00679	1.5307	4.14349	1.07996	4.19126	0.111349	1.89702	2.29425		Obviously, LF isotherm can be replaced by any other expressions
5	0.2	3.78057	5.15241	2.7326	6.8875	1.95287	6.87088	0.0950232	1.61887	5.25201		The details are listed above .(1) to .(11)
3.33333	0.3	5.15241	6.8875	3.78057	8.98908	2.7326	8.82192	0.0426246	0.726179	8.09574
2.5	0.4	6.34495	8.34269	4.71772	10.6765	3.44509	10.2929	-0.0185757	-0.316467	10.6093
2	0.5	7.39936	9.5902	5.5674	12.0716	4.10388	11.4225	-0.0778697	-1.32664	12.7491
1.66667	0.6	8.34269	10.6765	6.34495	13.2497	4.71772	12.299	-0.131084	-2.23323	14.5323
1.42857	0.7	9.1942	11.6337	7.06137	14.2607	5.29284	12.9829	-0.176896	-3.0137	15.9966
1.25	0.8	9.96838	12.4855	7.72507	15.1397	5.83399	13.517	-0.215261	-3.66731	17.1844
1.11111	0.9	10.6765	13.2497	8.34269	15.9122	6.34495	13.933	-0.246693	-4.20281	18.1358
1	1	11.3274	13.9398	8.9196	16.5973	6.82879	14.2546	-0.271919	-4.63258	18.8872
0.909091	1.1	11.9284	14.5669	9.46025	17.2097	7.28811	14.5	-0.291711	-4.96977	19.4698
0.833333	1.2	12.4855	15.1397	9.96838	17.7608	7.72507	14.6835	-0.306812	-5.22704	19.9106
0.769231	1.3	13.0038	15.6652	10.4472	18.2598	8.14159	14.8163	-0.317899	-5.41593	20.2322
0.714286	1.4	13.4873	16.1495	10.8994	18.7139	8.53928	14.9073	-0.325575	-5.54669	20.4539
0.666667	1.5	13.9398	16.5973	11.3274	19.1291	8.9196	14.9637	-0.330365	-5.6283	20.5919
0.625	1.6	14.3643	17.0129	11.7332	19.5105	9.28381	14.9913	-0.332724	-5.66849	20.6598
0.588235	1.7	14.7635	17.3997	12.1187	19.862	9.63307	14.9951	-0.333043	-5.67393	20.669
0.555556	1.8	15.1397	17.7608	12.4855	20.1873	9.96838	14.9788	-0.331658	-5.65033	20.6292
0.526316	1.9	15.4949	18.0988	12.8351	20.4892	10.2907	14.9459	-0.328853	-5.60255	20.5484
0.5	2	15.831	18.4158	13.1686	20.7702	10.6007	14.899	-0.324873	-5.53474	20.4337
0.47619	2.1	16.1495	18.7139	13.4873	21.0325	10.8994	14.8404	-0.319925	-5.45044	20.2908
0.454545	2.2	16.4518	18.9947	13.7922	21.278	11.1873	14.772	-0.314185	-5.35265	20.1246
0.434783	2.3	16.7392	19.2598	14.0843	21.5082	11.465	14.6955	-0.307804	-5.24393	19.9394
0.416667	2.4	17.0129	19.5105	14.3643	21.7246	11.7332	14.6122	-0.300908	-5.12646	19.7386
0.4	2.5	17.2738	19.7479	14.6331	21.9284	11.9924	14.5232	-0.293607	-5.00208	19.5253
0.384615	2.6	17.5228	19.9732	14.8913	22.1208	12.243	14.4297	-0.285993	-4.87236	19.3021
0.37037	2.7	17.7608	20.1873	15.1397	22.3026	12.4855	14.3324	-0.278144	-4.73863	19.071
0.357143	2.8	17.9885	20.391	15.3787	22.4748	12.7204	14.2321	-0.270125	-4.60202	18.8341
0.344828	2.9	18.2067	20.5851	15.609	22.6382	12.948	14.1293	-0.261994	-4.46349	18.5928
0.333333	3	18.4158	20.7702	15.831	22.7933	13.1686	14.0246	-0.253798	-4.32386	18.3485
0.322581	3.1	18.6165	20.947	16.0452	22.9408	13.3827	13.9185	-0.245576	-4.18379	18.1023
0.3125	3.2	18.8093	21.1161	16.252	23.0814	13.5905	13.8114	-0.237363	-4.04387	17.8553
0.30303	3.3	18.9947	21.278	16.4518	23.2154	13.7922	13.7036	-0.229188	-3.90458	17.6082
0.294118	3.4	19.1731	21.433	16.645	23.3433	13.9883	13.5953	-0.221073	-3.76633	17.3617
0.285714	3.5	19.3449	21.5818	16.8319	23.4656	14.1789	13.4869	-0.213038	-3.62945	17.1164
0.277778	3.6	19.5105	21.7246	17.0129	23.5826	14.3643	13.3786	-0.2051	-3.49421	16.8728
0.27027	3.7	19.6702	21.8618	17.1882	23.6947	14.5447	13.2705	-0.197272	-3.36085	16.6314
0.263158	3.8	19.8243	21.9938	17.3581	23.8022	14.7203	13.1628	-0.189566	-3.22956	16.3924
0.25641	3.9	19.9732	22.1208	17.5228	23.9053	14.8913	13.0557	-0.181989	-3.10047	16.1562
0.25	4	20.1171	22.2431	17.6827	24.0044	15.0579	12.9492	-0.174549	-2.97372	15.9229
0.243902	4.1	20.2563	22.3611	17.8378	24.0996	15.2203	12.8435	-0.167251	-2.84939	15.6929
0.238095	4.2	20.391	22.4748	17.9885	24.1912	15.3787	12.7386	-0.160099	-2.72754	15.4661
0.232558	4.3	20.5214	22.5847	18.135	24.2794	15.5331	12.6346	-0.153096	-2.60824	15.2428
0.227273	4.4	20.6477	22.6908	18.2773	24.3644	15.6839	12.5316	-0.146244	-2.4915	15.0231
0.222222	4.5	20.7702	22.7933	18.4158	24.4464	15.831	12.4296	-0.139543	-2.37735	14.807
0.217391	4.6	20.889	22.8925	18.5505	24.5255	15.9746	12.3287	-0.132995	-2.26579	14.5945
0.212766	4.7	21.0042	22.9884	18.6816	24.6019	16.1149	12.2289	-0.126599	-2.15681	14.3857
0.208333	4.8	21.1161	23.0814	18.8093	24.6757	16.252	12.1302	-0.120353	-2.05041	14.1807
0.204082	4.9	21.2248	23.1714	18.9337	24.7471	16.3859	12.0327	-0.114257	-1.94656	13.9793
0.2	5	21.3304	23.2587	19.0549	24.8162	16.5169	11.9363	-0.10831	-1.84524	13.7816
0.196078	5.1	21.433	23.3433	19.1731	24.883	16.645	11.8411	-0.102509	-1.74641	13.5875
0.192308	5.2	21.5329	23.4254	19.2883	24.9477	16.7703	11.7471	-0.096852	-1.65003	13.3972
0.188679	5.3	21.63	23.5052	19.4007	25.0104	16.8929	11.6543	-0.0913369	-1.55607	13.2104
0.185185	5.4	21.7246	23.5826	19.5105	25.0713	17.0129	11.5627	-0.0859612	-1.46449	13.0271
0.181818	5.5	21.8167	23.6579	19.6176	25.1303	17.1304	11.4722	-0.0807222	-1.37523	12.8474
0.178571	5.6	21.9064	23.731	19.7222	25.1875	17.2454	11.3829	-0.0756173	-1.28826	12.6712
0.175439	5.7	21.9938	23.8022	19.8243	25.2431	17.3581	11.2948	-0.0706436	-1.20353	12.4984
0.172414	5.8	22.079	23.8714	19.9242	25.2971	17.4685	11.2079	-0.0657983	-1.12098	12.3289
0.169492	5.9	22.1621	23.9388	20.0217	25.3496	17.5766	11.1222	-0.0610785	-1.04057	12.1627
0.166667	6	22.2431	24.0044	20.1171	25.4006	17.6827	11.0375	-0.0564814	-0.962253	11.9998
0.163934	6.1	22.3222	24.0682	20.2104	25.4503	17.7866	10.9541	-0.0520041	-0.885974	11.84
0.16129	6.2	22.3995	24.1305	20.3017	25.4986	17.8886	10.8717	-0.0476436	-0.811685	11.6834
0.15873	6.3	22.4748	24.1912	20.391	25.5456	17.9885	10.7905	-0.043397	-0.739339	11.5298
0.15625	6.4	22.5485	24.2504	20.4784	25.5914	18.0866	10.7104	-0.0392616	-0.668885	11.3793
0.153846	6.5	22.6204	24.3081	20.5639	25.636	18.1829	10.6313	-0.0352345	-0.600277	11.2316
0.151515	6.6	22.6908	24.3644	20.6477	25.6795	18.2773	10.5534	-0.031313	-0.533468	11.0869
0.149254	6.7	22.7595	24.4194	20.7298	25.7218	18.3701	10.4765	-0.0274943	-0.468409	10.9449
0.147059	6.8	22.8267	24.4731	20.8102	25.7632	18.4611	10.4006	-0.0237756	-0.405056	10.8057
0.144928	6.9	22.8925	24.5255	20.889	25.8035	18.5505	10.3258	-0.0201545	-0.343364	10.6692
0.142857	7	22.9568	24.5768	20.9662	25.8428	18.6383	10.252	-0.0166282	-0.283289	10.5353
0.140845	7.1	23.0197	24.6268	21.0419	25.8812	18.7246	10.1792	-0.0131943	-0.224787	10.404
0.138889	7.2	23.0814	24.6757	21.1161	25.9187	18.8093	10.1074	-0.00985031	-0.167816	10.2752
0.136986	7.3	23.1417	24.7236	21.1889	25.9553	18.8926	10.0365	-0.00659374	-0.112335	10.1488
0.135135	7.4	23.2008	24.7704	21.2603	25.9911	18.9744	9.96659	-0.00342227	-0.0583039	10.0249
0.133333	7.5	23.2587	24.8162	21.3304	26.0261	19.0549	9.89762	-0.000333579	-0.00568306	9.9033
0.131579	7.6	23.3154	24.861	21.3991	26.0603	19.134	9.82957	0.00267458	0.0455657	9.78401
0.12987	7.7	23.371	24.9048	21.4666	26.0937	19.2118	9.76243	0.00560439	0.0954799	9.66695
0.128205	7.8	23.4254	24.9477	21.5329	26.1264	19.2883	9.69618	0.008458	0.144096	9.55209
0.126582	7.9	23.4789	24.9898	21.598	26.1584	19.3636	9.63081	0.0112375	0.191449	9.43936
0.125	8	23.5312	25.0309	21.6618	26.1897	19.4376	9.5663	0.0139449	0.237573	9.32873
0.123457	8.1	23.5826	25.0713	21.7246	26.2204	19.5105	9.50264	0.0165821	0.282503	9.22014
0.121951	8.2	23.633	25.1108	21.7863	26.2504	19.5821	9.43981	0.0191512	0.326271	9.11354
0.120482	8.3	23.6825	25.1495	21.8468	26.2797	19.6527	9.3778	0.0216538	0.368908	9.00889
0.119048	8.4	23.731	25.1875	21.9064	26.3085	19.7222	9.3166	0.024092	0.410446	8.90615
0.117647	8.5	23.7787	25.2248	21.9649	26.3367	19.7905	9.25618	0.0264673	0.450914	8.80527
0.116279	8.6	23.8254	25.2613	22.0224	26.3644	19.8579	9.19655	0.0287816	0.490341	8.70621
0.114943	8.7	23.8714	25.2971	22.079	26.3914	19.9242	9.13768	0.0310365	0.528757	8.60892
0.113636	8.8	23.9165	25.3323	22.1346	26.418	19.9894	9.07956	0.0332335	0.566187	8.51337
0.11236	8.9	23.9608	25.3668	22.1893	26.444	20.0538	9.02217	0.0353744	0.60266	8.41951
0.111111	9	24.0044	25.4006	22.2431	26.4696	20.1171	8.96552	0.0374605	0.6382	8.32732
0.10989	9.1	24.0471	25.4339	22.2961	26.4946	20.1795	8.90957	0.0394934	0.672834	8.23674
0.108696	9.2	24.0892	25.4665	22.3482	26.5192	20.2411	8.85433	0.0414745	0.706585	8.14774
0.107527	9.3	24.1305	25.4986	22.3995	26.5433	20.3017	8.79977	0.0434052	0.739477	8.0603
0.106383	9.4	24.1711	25.5301	22.4499	26.567	20.3614	8.74589	0.0452868	0.771534	7.97436
0.105263	9.5	24.2111	25.561	22.4996	26.5903	20.4203	8.69268	0.0471207	0.802777	7.8899
0.104167	9.6	24.2504	25.5914	22.5485	26.6131	20.4784	8.64012	0.0489081	0.833229	7.80689
0.103093	9.7	24.289	25.6213	22.5966	26.6355	20.5356	8.5882	0.0506503	0.86291	7.72529
0.102041	9.8	24.327	25.6506	22.6441	26.6575	20.5921	8.53691	0.0523485	0.891841	7.64507
0.10101	9.9	24.3644	25.6795	22.6908	26.6791	20.6477	8.48625	0.0540038	0.920042	7.56621
0.1	10	24.4012	25.7078	22.7367	26.7004	20.7026	8.43619	0.0556173	0.947532	7.48866
0.0990099	10.1	24.4375	25.7357	22.7821	26.7213	20.7568	8.38673	0.0571903	0.974329	7.41241
0.0980392	10.2	24.4731	25.7632	22.8267	26.7418	20.8102	8.33787	0.0587237	1.00045	7.33741
0.0970874	10.3	24.5082	25.7901	22.8707	26.762	20.8629	8.28958	0.0602185	1.02592	7.26366
0.0961538	10.4	24.5427	25.8167	22.9141	26.7818	20.9149	8.24186	0.0616759	1.05075	7.19111
0.0952381	10.5	24.5768	25.8428	22.9568	26.8013	20.9662	8.1947	0.0630967	1.07495	7.11975
0.0943396	10.6	24.6103	25.8685	22.9989	26.8205	21.0168	8.1481	0.0644819	1.09855	7.04954
0.0934579	10.7	24.6432	25.8938	23.0404	26.8394	21.0668	8.10203	0.0658324	1.12156	6.98047
0.0925926	10.8	24.6757	25.9187	23.0814	26.858	21.1161	8.0565	0.0671491	1.14399	6.9125
0.0917431	10.9	24.7078	25.9432	23.1217	26.8762	21.1648	8.01149	0.0684329	1.16587	6.84562
0.0909091	11	24.7393	25.9674	23.1615	26.8942	21.2129	7.96699	0.0696847	1.18719	6.7798
0.0900901	11.1	24.7704	25.9911	23.2008	26.9119	21.2603	7.923	0.0709052	1.20799	6.71502
0.0892857	11.2	24.801	26.0145	23.2395	26.9293	21.3072	7.87951	0.0720953	1.22826	6.65125
0.0884956	11.3	24.8312	26.0376	23.2777	26.9465	21.3535	7.83651	0.0732557	1.24803	6.58848
0.0877193	11.4	24.861	26.0603	23.3154	26.9634	21.3991	7.79399	0.0743871	1.2673	6.52669
0.0869565	11.5	24.8903	26.0827	23.3526	26.98	21.4443	7.75195	0.0754904	1.2861	6.46585
0.0862069	11.6	24.9192	26.1047	23.3892	26.9963	21.4889	7.71037	0.0765661	1.30443	6.40594
0.0854701	11.7	24.9477	26.1264	23.4254	27.0125	21.5329	7.66925	0.0776151	1.3223	6.34696
0.0833333	12	25.0309	26.1897	23.5312	27.0594	21.6618	7.54858	0.0806078	1.37328	6.1753
0.0813008	12.3	25.1108	26.2504	23.633	27.1043	21.7863	7.43178	0.0833822	1.42055	6.01123
0.0793651	12.6	25.1875	26.3085	23.731	27.1473	21.9064	7.31867	0.0859542	1.46437	5.8543
0.0775194	12.9	25.2613	26.3644	23.8254	27.1886	22.0224	7.20909	0.0883381	1.50498	5.7041
0.0757576	13.2	25.3323	26.418	23.9165	27.2282	22.1346	7.10287	0.0905472	1.54262	5.56025
0.0740741	13.5	25.4006	26.4696	24.0044	27.2662	22.2431	6.99986	0.0925938	1.57749	5.42237
0.0724638	13.8	25.4665	26.5192	24.0892	27.3027	22.3482	6.89992	0.0944892	1.60978	5.29015
0.070922	14.1	25.5301	26.567	24.1711	27.3379	22.4499	6.80292	0.0962436	1.63967	5.16326
0.0694444	14.4	25.5914	26.6131	24.2504	27.3717	22.5485	6.70873	0.0978668	1.66732	5.04141
0.0680272	14.7	25.6506	26.6575	24.327	27.4044	22.6441	6.61723	0.0993676	1.69289	4.92434
0.0666667	15	25.7078	26.7004	24.4012	27.4358	22.7367	6.5283	0.100754	1.71651	4.81179
0.0653595	15.3	25.7632	26.7418	24.4731	27.4662	22.8267	6.44185	0.102034	1.73832	4.70353
0.0641026	15.6	25.8167	26.7818	24.5427	27.4955	22.9141	6.35776	0.103215	1.75843	4.59933
0.0628931	15.9	25.8685	26.8205	24.6103	27.5238	22.9989	6.27594	0.104302	1.77695	4.49899
0.0617284	16.2	25.9187	26.858	24.6757	27.5511	23.0814	6.1963	0.105302	1.79399	4.40231
0.0606061	16.5	25.9674	26.8942	24.7393	27.5776	23.1615	6.11876	0.106221	1.80965	4.30911
0.0595238	16.8	26.0145	26.9293	24.801	27.6032	23.2395	6.04323	0.107064	1.82401	4.21922
0.0584795	17.1	26.0603	26.9634	24.861	27.628	23.3154	5.96963	0.107835	1.83715	4.13249
0.0574713	17.4	26.1047	26.9963	24.9192	27.6521	23.3892	5.8979	0.10854	1.84915	4.04875
0.0564972	17.7	26.1478	27.0283	24.9758	27.6754	23.4612	5.82796	0.109182	1.86008	3.96787
0.0555556	18	26.1897	27.0594	25.0309	27.698	23.5312	5.75974	0.109765	1.87002	3.88972
0.0546448	18.3	26.2304	27.0896	25.0845	27.7199	23.5995	5.69318	0.110293	1.87901	3.81416
0.0537634	18.6	26.27	27.1189	25.1367	27.7412	23.6661	5.62822	0.110769	1.88713	3.74109
0.0529101	18.9	26.3085	27.1473	25.1875	27.7619	23.731	5.5648	0.111197	1.89442	3.67039
0.0520833	19.2	26.346	27.175	25.237	27.782	23.7944	5.50288	0.111579	1.90093	3.60195
0.0512821	19.5	26.3825	27.202	25.2853	27.8015	23.8562	5.44238	0.111918	1.90671	3.53567
0.0505051	19.8	26.418	27.2282	25.3323	27.8205	23.9165	5.38328	0.112218	1.91181	3.47147
0.0497512	20.1	26.4526	27.2537	25.3781	27.839	23.9754	5.32551	0.112479	1.91626	3.40925
0.0490196	20.4	26.4863	27.2785	25.4229	27.857	24.033	5.26904	0.112705	1.92011	3.34893
0.0483092	20.7	26.5192	27.3027	25.4665	27.8745	24.0892	5.21381	0.112897	1.92339	3.29042
0.047619	21	26.5513	27.3263	25.5091	27.8916	24.1441	5.15979	0.113058	1.92613	3.23366
0.0469484	21.3	26.5826	27.3493	25.5507	27.9082	24.1979	5.10694	0.11319	1.92838	3.17857
0.0462963	21.6	26.6131	27.3717	25.5914	27.9244	24.2504	5.05523	0.113294	1.93014	3.12508
0.0456621	21.9	26.6429	27.3936	25.6311	27.9402	24.3018	5.0046	0.113371	1.93146	3.07314
0.045045	22.2	26.672	27.415	25.6699	27.9556	24.352	4.95504	0.113424	1.93237	3.02267
0.0444444	22.5	26.7004	27.4358	25.7078	27.9707	24.4012	4.9065	0.113454	1.93288	2.97362
0.0438596	22.8	26.7282	27.4562	25.7449	27.9853	24.4494	4.85895	0.113462	1.93301	2.92594
0.04329	23.1	26.7553	27.476	25.7812	27.9997	24.4966	4.81237	0.11345	1.9328	2.87957
0.042735	23.4	26.7818	27.4955	25.8167	28.0137	24.5427	4.76672	0.113418	1.93226	2.83446
0.0421941	23.7	26.8078	27.5144	25.8514	28.0273	24.588	4.72198	0.113368	1.93141	2.79057
0.0416667	24	26.8331	27.533	25.8854	28.0407	24.6323	4.67812	0.113301	1.93026	2.74785
0.0411523	24.3	26.858	27.5511	25.9187	28.0538	24.6757	4.63511	0.113218	1.92885	2.70626
0.0406504	24.6	26.8823	27.5689	25.9513	28.0665	24.7183	4.59292	0.113119	1.92717	2.66575
0.0401606	24.9	26.906	27.5862	25.9832	28.079	24.7601	4.55155	0.113007	1.92525	2.62629
0.0396825	25.2	26.9293	27.6032	26.0145	28.0912	24.801	4.51095	0.112881	1.92311	2.58784
0.0392157	25.5	26.9521	27.6198	26.0452	28.1032	24.8412	4.47111	0.112742	1.92075	2.55036
0.0387597	25.8	26.9745	27.6361	26.0752	28.1149	24.8806	4.43201	0.112592	1.91818	2.51382
0.0383142	26.1	26.9963	27.6521	26.1047	28.1263	24.9192	4.39362	0.11243	1.91543	2.47819
0.0378788	26.4	27.0178	27.6677	26.1336	28.1376	24.9571	4.35593	0.112258	1.91249	2.44344
0.0374532	26.7	27.0388	27.683	26.1619	28.1485	24.9944	4.31892	0.112076	1.90939	2.40952
0.037037	27	27.0594	27.698	26.1897	28.1593	25.0309	4.28256	0.111884	1.90613	2.37643
0.03663	27.3	27.0796	27.7127	26.217	28.1698	25.0668	4.24685	0.111684	1.90273	2.34413
0.0362319	27.6	27.0994	27.7271	26.2438	28.1802	25.1021	4.21177	0.111476	1.89918	2.31259
0.0358423	27.9	27.1189	27.7412	26.27	28.1903	25.1367	4.17729	0.11126	1.8955	2.28179
0.035461	28.2	27.1379	27.755	26.2958	28.2002	25.1707	4.1434	0.111037	1.8917	2.2517
0.0350877	28.5	27.1567	27.7686	26.3211	28.21	25.2042	4.11009	0.110808	1.88779	2.2223
0.0347222	28.8	27.175	27.782	26.346	28.2195	25.237	4.07734	0.110572	1.88376	2.19358
0.0343643	29.1	27.1931	27.7951	26.3704	28.2289	25.2693	4.04514	0.110329	1.87964	2.1655
0.0340136	29.4	27.2108	27.8079	26.3944	28.2381	25.3011	4.01347	0.110082	1.87542	2.13805
0.03367	29.7	27.2282	27.8205	26.418	28.2471	25.3323	3.98233	0.109829	1.87112	2.11121
0.0333333	30	27.2453	27.8329	26.4412	28.256	25.363	3.95169	0.109572	1.86673	2.08496
0.0330033	30.3	27.262	27.845	26.4639	28.2647	25.3932	3.92154	0.10931	1.86227	2.05927
0.0326797	30.6	27.2785	27.857	26.4863	28.2732	25.4229	3.89188	0.109043	1.85773	2.03415
0.0323625	30.9	27.2947	27.8687	26.5083	28.2816	25.4521	3.86269	0.108773	1.85313	2.00956
0.0320513	31.2	27.3107	27.8802	26.53	28.2898	25.4808	3.83396	0.1085	1.84847	1.98549
0.031746	31.5	27.3263	27.8916	26.5513	28.2979	25.5091	3.80567	0.108222	1.84374	1.96193
0.0314465	31.8	27.3417	27.9027	26.5722	28.3059	25.537	3.77783	0.107942	1.83897	1.93886
0.0311526	32.1	27.3569	27.9136	26.5928	28.3137	25.5644	3.75041	0.107659	1.83415	1.91627
0.0308642	32.4	27.3717	27.9244	26.6131	28.3214	25.5914	3.72341	0.107373	1.82928	1.89414
0.030581	32.7	27.3864	27.935	26.633	28.329	25.618	3.69682	0.107085	1.82437	1.87246
0.030303	33	27.4008	27.9454	26.6527	28.3364	25.6441	3.67063	0.106795	1.81942	1.85121
0.03003	33.3	27.415	27.9556	26.672	28.3437	25.6699	3.64483	0.106502	1.81444	1.83039
0.0297619	33.6	27.4289	27.9657	26.691	28.3509	25.6953	3.61941	0.106208	1.80942	1.80999
0.0294985	33.9	27.4426	27.9756	26.7097	28.3579	25.7203	3.59436	0.105912	1.80438	1.78998
0.0292398	34.2	27.4562	27.9853	26.7282	28.3649	25.7449	3.56968	0.105614	1.79931	1.77037
0.0289855	34.5	27.4695	27.9949	26.7463	28.3717	25.7692	3.54535	0.105315	1.79421	1.75114
0.0287356	34.8	27.4826	28.0044	26.7642	28.3785	25.7931	3.52137	0.105015	1.7891	1.73227
0.02849	35.1	27.4955	28.0137	26.7818	28.3851	25.8167	3.49773	0.104713	1.78396	1.71377
0.0282486	35.4	27.5082	28.0228	26.7992	28.3916	25.8399	3.47443	0.104411	1.77881	1.69561
0.0280112	35.7	27.5207	28.0318	26.8163	28.398	25.8628	3.45145	0.104108	1.77365	1.6778
0.0277778	36	27.533	28.0407	26.8331	28.4044	25.8854	3.42879	0.103804	1.76847	1.66032
0.0275482	36.3	27.5451	28.0494	26.8498	28.4106	25.9077	3.40645	0.1035	1.76329	1.64316
0.0273224	36.6	27.5571	28.0581	26.8661	28.4167	25.9297	3.38441	0.103195	1.75809	1.62632
0.0271003	36.9	27.5689	28.0665	26.8823	28.4228	25.9513	3.36267	0.102889	1.75289	1.60978
0.0268817	37.2	27.5805	28.0749	26.8982	28.4287	25.9727	3.34122	0.102584	1.74768	1.59354
0.0266667	37.5	27.5919	28.0831	26.9139	28.4346	25.9937	3.32006	0.102278	1.74247	1.57759
0.026455	37.8	27.6032	28.0912	26.9293	28.4403	26.0145	3.29918	0.101972	1.73726	1.56193
0.0262467	38.1	27.6143	28.0992	26.9446	28.446	26.035	3.27858	0.101666	1.73204	1.54654
0.0260417	38.4	27.6253	28.1071	26.9596	28.4516	26.0553	3.25825	0.10136	1.72683	1.53143
0.0258398	38.7	27.6361	28.1149	26.9745	28.4572	26.0752	3.23819	0.101054	1.72162	1.51657
0.025641	39	27.6468	28.1226	26.9891	28.4626	26.0949	3.21838	0.100748	1.71641	1.50198
0.0254453	39.3	27.6573	28.1301	27.0035	28.468	26.1144	3.19883	0.100443	1.7112	1.48763
0.0252525	39.6	27.6677	28.1376	27.0178	28.4733	26.1336	3.17953	0.100137	1.706	1.47353
0.0250627	39.9	27.6779	28.1449	27.0318	28.4785	26.1525	3.16048	0.0998326	1.70081	1.45967
0.0248756	40.2	27.688	28.1522	27.0457	28.4837	26.1712	3.14166	0.0995282	1.69562	1.44604
0.0246914	40.5	27.698	28.1593	27.0594	28.4887	26.1897	3.12308	0.0992243	1.69045	1.43263
0.0245098	40.8	27.7078	28.1664	27.0729	28.4937	26.208	3.10473	0.0989209	1.68528	1.41946
0.0243309	41.1	27.7175	28.1733	27.0863	28.4987	26.226	3.08661	0.0986181	1.68012	1.40649
0.0241546	41.4	27.7271	28.1802	27.0994	28.5036	26.2438	3.06871	0.0983159	1.67497	1.39374
0.0239808	41.7	27.7365	28.187	27.1124	28.5084	26.2613	3.05103	0.0980143	1.66983	1.3812
0.0238095	42	27.7458	28.1936	27.1253	28.5131	26.2787	3.03357	0.0977135	1.66471	1.36886
0.0236407	42.3	27.755	28.2002	27.1379	28.5178	26.2958	3.01631	0.0974134	1.6596	1.35672
0.0234742	42.6	27.7641	28.2068	27.1505	28.5224	26.3127	2.99926	0.0971141	1.6545	1.34477
0.02331	42.9	27.7731	28.2132	27.1628	28.527	26.3295	2.98242	0.0968156	1.64941	1.333
0.0231481	43.2	27.782	28.2195	27.175	28.5315	26.346	2.96577	0.0965179	1.64434	1.32143
0.0229885	43.5	27.7907	28.2258	27.1871	28.536	26.3623	2.94932	0.0962211	1.63928	1.31003
0.0228311	43.8	27.7994	28.232	27.199	28.5403	26.3785	2.93306	0.0959253	1.63424	1.29882
0.0226757	44.1	27.8079	28.2381	27.2108	28.5447	26.3944	2.91699	0.0956303	1.62922	1.28777
0.0225225	44.4	27.8163	28.2441	27.2224	28.549	26.4102	2.9011	0.0953363	1.62421	1.27689
0.0223714	44.7	27.8247	28.2501	27.2339	28.5532	26.4258	2.8854	0.0950432	1.61922	1.26618
0.0222222	45	27.8329	28.256	27.2453	28.5574	26.4412	2.86987	0.0947512	1.61424	1.25563
0.0220751	45.3	27.841	28.2618	27.2565	28.5615	26.4564	2.85453	0.0944602	1.60928	1.24524
0.0219298	45.6	27.849	28.2675	27.2676	28.5656	26.4715	2.83935	0.0941702	1.60434	1.23501
0.0217865	45.9	27.857	28.2732	27.2785	28.5696	26.4863	2.82434	0.0938813	1.59942	1.22492
0.021645	46.2	27.8648	28.2788	27.2894	28.5736	26.5011	2.80951	0.0935935	1.59452	1.21499
0.0215054	46.5	27.8726	28.2844	27.3001	28.5775	26.5156	2.79483	0.0933067	1.58963	1.2052
0.0213675	46.8	27.8802	28.2898	27.3107	28.5814	26.53	2.78032	0.0930211	1.58476	1.19555
0.0212314	47.1	27.8878	28.2953	27.3211	28.5852	26.5442	2.76596	0.0927365	1.57992	1.18605
0.021097	47.4	27.8953	28.3006	27.3315	28.589	26.5583	2.75176	0.0924531	1.57509	1.17668
0.0209644	47.7	27.9027	28.3059	27.3417	28.5927	26.5722	2.73772	0.0921709	1.57028	1.16744
0.0208333	48	27.91	28.3111	27.3518	28.5964	26.586	2.72383	0.0918898	1.56549	1.15833
0.0207039	48.3	27.9173	28.3163	27.3619	28.6001	26.5996	2.71008	0.0916099	1.56072	1.14936
0.0205761	48.6	27.9244	28.3214	27.3717	28.6037	26.6131	2.69648	0.0913311	1.55597	1.14051
0.0204499	48.9	27.9315	28.3265	27.3815	28.6073	26.6264	2.68302	0.0910535	1.55124	1.13178
0.0203252	49.2	27.9385	28.3314	27.3912	28.6108	26.6396	2.66971	0.0907771	1.54654	1.12317
0.020202	49.5	27.9454	28.3364	27.4008	28.6143	26.6527	2.65654	0.0905019	1.54185	1.11469
0.0200803	49.8	27.9522	28.3413	27.4103	28.6178	26.6656	2.6435	0.090228	1.53718	1.10632
0.0199601	50.1	27.959	28.3461	27.4196	28.6212	26.6784	2.63059	0.0899552	1.53253	1.09806
0.0198413	50.4	27.9657	28.3509	27.4289	28.6246	26.691	2.61782	0.0896836	1.52791	1.08992
0.0197239	50.7	27.9723	28.3556	27.4381	28.6279	26.7035	2.60518	0.0894133	1.5233	1.08188
0.0196078	51	27.9789	28.3603	27.4472	28.6312	26.7159	2.59267	0.0891441	1.51871	1.07396
0.0194932	51.3	27.9853	28.3649	27.4562	28.6345	26.7282	2.58029	0.0888762	1.51415	1.06614
0.0193798	51.6	27.9918	28.3695	27.4651	28.6377	26.7403	2.56803	0.0886096	1.50961	1.05842
0.0192678	51.9	27.9981	28.374	27.4738	28.6409	26.7523	2.55589	0.0883441	1.50509	1.0508
0.0191571	52.2	28.0044	28.3785	27.4826	28.6441	26.7642	2.54387	0.0880799	1.50058	1.04329
0.0190476	52.5	28.0106	28.3829	27.4912	28.6472	26.776	2.53197	0.0878169	1.4961	1.03587
0.0189394	52.8	28.0167	28.3873	27.4997	28.6503	26.7876	2.52019	0.0875552	1.49164	1.02855
0.0188324	53.1	28.0228	28.3916	27.5082	28.6534	26.7992	2.50853	0.0872947	1.48721	1.02132
0.0187266	53.4	28.0288	28.3959	27.5165	28.6564	26.8106	2.49698	0.0870354	1.48279	1.01419
0.018622	53.7	28.0348	28.4002	27.5248	28.6594	26.8219	2.48554	0.0867774	1.47839	1.00714
0.0185185	54	28.0407	28.4044	27.533	28.6624	26.8331	2.47421	0.0865206	1.47402	1.00019
0.0184162	54.3	28.0465	28.4085	27.5411	28.6654	26.8442	2.46299	0.086265	1.46966	0.993325
0.018315	54.6	28.0523	28.4126	27.5491	28.6683	26.8552	2.45188	0.0860107	1.46533	0.986545
0.0182149	54.9	28.0581	28.4167	27.5571	28.6711	26.8661	2.44087	0.0857576	1.46102	0.97985
0.0181159	55.2	28.0637	28.4207	27.565	28.674	26.8769	2.42997	0.0855057	1.45673	0.973238
0.018018	55.5	28.0693	28.4247	27.5728	28.6768	26.8876	2.41917	0.0852551	1.45246	0.966707
0.0179211	55.8	28.0749	28.4287	27.5805	28.6796	26.8982	2.40847	0.0850057	1.44821	0.960257
0.0178253	56.1	28.0804	28.4326	27.5881	28.6824	26.9087	2.39787	0.0847575	1.44398	0.953886
0.0177305	56.4	28.0858	28.4365	27.5957	28.6851	26.919	2.38737	0.0845105	1.43977	0.947592
0.0176367	56.7	28.0912	28.4403	27.6032	28.6878	26.9293	2.37696	0.0842648	1.43559	0.941375
0.0175439	57	28.0966	28.4441	27.6106	28.6905	26.9395	2.36665	0.0840202	1.43142	0.935232
0.017452	57.3	28.1019	28.4479	27.618	28.6932	26.9496	2.35644	0.0837769	1.42728	0.929163
0.0173611	57.6	28.1071	28.4516	27.6253	28.6958	26.9596	2.34632	0.0835348	1.42315	0.923166
0.0172712	57.9	28.1123	28.4553	27.6325	28.6984	26.9695	2.33629	0.0832939	1.41905	0.91724
0.0171821	58.2	28.1175	28.459	27.6397	28.701	26.9794	2.32635	0.0830542	1.41496	0.911384
0.017094	58.5	28.1226	28.4626	27.6468	28.7036	26.9891	2.3165	0.0828157	1.4109	0.905597
0.0170068	58.8	28.1276	28.4662	27.6538	28.7061	26.9987	2.30673	0.0825784	1.40686	0.899877
0.0169205	59.1	28.1326	28.4698	27.6608	28.7086	27.0083	2.29706	0.0823423	1.40283	0.894224
0.016835	59.4	28.1376	28.4733	27.6677	28.7111	27.0178	2.28747	0.0821073	1.39883	0.888636
0.0167504	59.7	28.1425	28.4768	27.6745	28.7136	27.0272	2.27796	0.0818736	1.39485	0.883113
0.0166667	60	28.1473	28.4802	27.6813	28.716	27.0365	2.26854	0.081641	1.39089	0.877653
0.0165837	60.3	28.1522	28.4837	27.688	28.7184	27.0457	2.2592	0.0814096	1.38694	0.872255
0.0165017	60.6	28.1569	28.487	27.6947	28.7208	27.0549	2.24994	0.0811793	1.38302	0.866918
0.0164204	60.9	28.1617	28.4904	27.7013	28.7232	27.0639	2.24076	0.0809502	1.37912	0.861641
0.0163399	61.2	28.1664	28.4937	27.7078	28.7255	27.0729	2.23166	0.0807223	1.37524	0.856423
0.0162602	61.5	28.171	28.497	27.7143	28.7279	27.0818	2.22264	0.0804955	1.37137	0.851264
0.0161812	61.8	28.1756	28.5003	27.7207	28.7302	27.0907	2.21369	0.0802699	1.36753	0.846163
0.0161031	62.1	28.1802	28.5036	27.7271	28.7325	27.0994	2.20482	0.0800454	1.3637	0.841117
0.0160256	62.4	28.1847	28.5068	27.7334	28.7347	27.1081	2.19603	0.0798221	1.3599	0.836127
0.015949	62.7	28.1892	28.51	27.7396	28.737	27.1167	2.1873	0.0795998	1.35611	0.831192
0.015873	63	28.1936	28.5131	27.7458	28.7392	27.1253	2.17866	0.0793787	1.35235	0.826311
0.0157978	63.3	28.198	28.5163	27.752	28.7414	27.1337	2.17008	0.0791588	1.3486	0.821483
0.0157233	63.6	28.2024	28.5194	27.7581	28.7436	27.1421	2.16158	0.0789399	1.34487	0.816707
0.0156495	63.9	28.2068	28.5224	27.7641	28.7458	27.1505	2.15314	0.0787222	1.34116	0.811982
0.0155763	64.2	28.211	28.5255	27.7701	28.7479	27.1587	2.14478	0.0785055	1.33747	0.807308
0.0155039	64.5	28.2153	28.5285	27.7761	28.7501	27.1669	2.13648	0.0782899	1.3338	0.802684
0.0154321	64.8	28.2195	28.5315	27.782	28.7522	27.175	2.12825	0.0780755	1.33014	0.798109
0.015361	65.1	28.2237	28.5345	27.7878	28.7543	27.1831	2.12009	0.0778621	1.32651	0.793582
0.0152905	65.4	28.2279	28.5374	27.7936	28.7564	27.1911	2.11199	0.0776498	1.32289	0.789102
0.0152207	65.7	28.232	28.5403	27.7994	28.7584	27.199	2.10396	0.0774386	1.31929	0.78467
0.0151515	66	28.2361	28.5432	27.8051	28.7605	27.2069	2.096	0.0772284	1.31571	0.780284
0.015083	66.3	28.2401	28.5461	27.8107	28.7625	27.2147	2.08809	0.0770193	1.31215	0.775943
0.015015	66.6	28.2441	28.549	27.8163	28.7645	27.2224	2.08025	0.0768113	1.3086	0.771647
0.0149477	66.9	28.2481	28.5518	27.8219	28.7665	27.2301	2.07247	0.0766043	1.30508	0.767395
0.014881	67.2	28.2521	28.5546	27.8274	28.7684	27.2377	2.06476	0.0763984	1.30157	0.763187
0.0148148	67.5	28.256	28.5574	27.8329	28.7704	27.2453	2.0571	0.0761935	1.29808	0.759022
0.0147493	67.8	28.2599	28.5601	27.8383	28.7723	27.2528	2.0495	0.0759896	1.29461	0.754899
0.0146843	68.1	28.2637	28.5629	27.8437	28.7743	27.2602	2.04197	0.0757867	1.29115	0.750817
0.0146199	68.4	28.2675	28.5656	27.849	28.7762	27.2676	2.03449	0.0755849	1.28771	0.746777
0.014556	68.7	28.2713	28.5682	27.8544	28.7781	27.2749	2.02707	0.0753841	1.28429	0.742777
0.0144928	69	28.2751	28.5709	27.8596	28.78	27.2822	2.0197	0.0751843	1.28089	0.738817
0.01443	69.3	28.2788	28.5736	27.8648	28.7818	27.2894	2.0124	0.0749855	1.2775	0.734896
0.0143678	69.6	28.2825	28.5762	27.87	28.7837	27.2965	2.00514	0.0747877	1.27413	0.731014
0.0143062	69.9	28.2862	28.5788	27.8751	28.7855	27.3036	1.99795	0.0745909	1.27078	0.72717
0.014245	70.2	28.2898	28.5814	27.8802	28.7873	27.3107	1.99081	0.0743951	1.26744	0.723364
0.0141844	70.5	28.2935	28.5839	27.8853	28.7891	27.3177	1.98372	0.0742003	1.26412	0.719595
0.0141243	70.8	28.2971	28.5865	27.8903	28.7909	27.3246	1.97668	0.0740064	1.26082	0.715863
0.0140647	71.1	28.3006	28.589	27.8953	28.7927	27.3315	1.9697	0.0738135	1.25753	0.712166
0.0140056	71.4	28.3041	28.5915	27.9002	28.7945	27.3383	1.96277	0.0736216	1.25426	0.708506
0.013947	71.7	28.3076	28.594	27.9052	28.7962	27.3451	1.95589	0.0734306	1.25101	0.70488
0.0138889	72	28.3111	28.5964	27.91	28.7979	27.3518	1.94906	0.0732406	1.24777	0.701289
0.0138313	72.3	28.3146	28.5989	27.9149	28.7997	27.3585	1.94228	0.0730515	1.24455	0.697732
0.0137741	72.6	28.318	28.6013	27.9196	28.8014	27.3652	1.93556	0.0728634	1.24135	0.694209
0.0137174	72.9	28.3214	28.6037	27.9244	28.8031	27.3717	1.92888	0.0726762	1.23816	0.690719
0.0136612	73.2	28.3248	28.6061	27.9291	28.8047	27.3783	1.92225	0.0724899	1.23498	0.687262
0.0136054	73.5	28.3281	28.6085	27.9338	28.8064	27.3848	1.91566	0.0723046	1.23183	0.683838
0.0135501	73.8	28.3314	28.6108	27.9385	28.8081	27.3912	1.90913	0.0721201	1.22868	0.680445
0.0134953	74.1	28.3347	28.6132	27.9431	28.8097	27.3976	1.90264	0.0719366	1.22556	0.677084
0.0134409	74.4	28.338	28.6155	27.9477	28.8113	27.404	1.8962	0.071754	1.22245	0.673753
0.0133869	74.7	28.3413	28.6178	27.9522	28.813	27.4103	1.8898	0.0715723	1.21935	0.670454
0.0133333	75	28.3445	28.6201	27.9568	28.8146	27.4165	1.88345	0.0713914	1.21627	0.667185
0.0132802	75.3	28.3477	28.6223	27.9612	28.8162	27.4227	1.87715	0.0712115	1.2132	0.663945
0.0132275	75.6	28.3509	28.6246	27.9657	28.8177	27.4289	1.87089	0.0710324	1.21015	0.660735
0.0131752	75.9	28.354	28.6268	27.9701	28.8193	27.435	1.86467	0.0708543	1.20712	0.657554
0.0131234	76.2	28.3572	28.629	27.9745	28.8209	27.4411	1.8585	0.070677	1.2041	0.654402
0.0130719	76.5	28.3603	28.6312	27.9789	28.8224	27.4472	1.85237	0.0705005	1.20109	0.651279
0.0130208	76.8	28.3634	28.6334	27.9832	28.824	27.4532	1.84628	0.0703249	1.1981	0.648183
0.0129702	77.1	28.3664	28.6356	27.9875	28.8255	27.4591	1.84024	0.0701502	1.19512	0.645114
0.0129199	77.4	28.3695	28.6377	27.9918	28.827	27.4651	1.83423	0.0699763	1.19216	0.642074
0.01287	77.7	28.3725	28.6399	27.996	28.8285	27.4709	1.82827	0.0698033	1.18921	0.639059
0.0128205	78	28.3755	28.642	28.0002	28.83	27.4768	1.82235	0.0696311	1.18628	0.636072
0.0127714	78.3	28.3785	28.6441	28.0044	28.8315	27.4826	1.81647	0.0694598	1.18336	0.633111
0.0127226	78.6	28.3814	28.6462	28.0085	28.8329	27.4883	1.81063	0.0692892	1.18045	0.630175
0.0126743	78.9	28.3844	28.6483	28.0126	28.8344	27.494	1.80483	0.0691195	1.17756	0.627266
0.0126263	79.2	28.3873	28.6503	28.0167	28.8359	27.4997	1.79907	0.0689506	1.17469	0.624381
0.0125786	79.5	28.3902	28.6524	28.0208	28.8373	27.5053	1.79334	0.0687826	1.17182	0.621522
0.0125313	79.8	28.393	28.6544	28.0248	28.8387	27.5109	1.78766	0.0686153	1.16897	0.618687
0.0124844	80.1	28.3959	28.6564	28.0288	28.8401	27.5165	1.78201	0.0684488	1.16614	0.615876
0.0124378	80.4	28.3987	28.6584	28.0328	28.8416	27.522	1.7764	0.0682832	1.16331	0.61309
0.0123916	80.7	28.4016	28.6604	28.0368	28.843	27.5275	1.77083	0.0681183	1.16051	0.610327
0.0123457	81	28.4044	28.6624	28.0407	28.8443	27.533	1.7653	0.0679542	1.15771	0.607588
0.0123001	81.3	28.4071	28.6644	28.0446	28.8457	27.5384	1.7598	0.0677909	1.15493	0.604871
0.0122549	81.6	28.4099	28.6663	28.0485	28.8471	27.5438	1.75434	0.0676284	1.15216	0.602178
0.01221	81.9	28.4126	28.6683	28.0523	28.8485	27.5491	1.74891	0.0674666	1.1494	0.599507
0.0121655	82.2	28.4154	28.6702	28.0562	28.8498	27.5544	1.74352	0.0673056	1.14666	0.596859
0.0121212	82.5	28.4181	28.6721	28.06	28.8512	27.5597	1.73816	0.0671454	1.14393	0.594233
0.0120773	82.8	28.4207	28.674	28.0637	28.8525	27.565	1.73284	0.0669859	1.14121	0.591628
0.0120337	83.1	28.4234	28.6759	28.0675	28.8538	27.5702	1.72756	0.0668272	1.13851	0.589045
0.0119904	83.4	28.4261	28.6778	28.0712	28.8551	27.5753	1.7223	0.0666692	1.13582	0.586484
0.0119474	83.7	28.4287	28.6796	28.0749	28.8564	27.5805	1.71708	0.066512	1.13314	0.583943
0.0119048	84	28.4313	28.6815	28.0786	28.8577	27.5856	1.7119	0.0663555	1.13047	0.581423
0.0118624	84.3	28.4339	28.6833	28.0822	28.859	27.5907	1.70674	0.0661998	1.12782	0.578924
0.0118203	84.6	28.4365	28.6851	28.0858	28.8603	27.5957	1.70162	0.0660448	1.12518	0.576445
0.0117786	84.9	28.4391	28.6869	28.0894	28.8616	27.6007	1.69654	0.0658905	1.12255	0.573986
0.0117371	85.2	28.4416	28.6887	28.093	28.8629	27.6057	1.69148	0.0657369	1.11993	0.571547
0.0116959	85.5	28.4441	28.6905	28.0966	28.8641	27.6106	1.68646	0.065584	1.11733	0.569127
0.011655	85.8	28.4467	28.6923	28.1001	28.8654	27.6156	1.68146	0.0654319	1.11474	0.566727
0.0116144	86.1	28.4492	28.6941	28.1036	28.8666	27.6204	1.6765	0.0652804	1.11216	0.564346
0.0115741	86.4	28.4516	28.6958	28.1071	28.8678	27.6253	1.67157	0.0651297	1.10959	0.561984
0.011534	86.7	28.4541	28.6976	28.1106	28.8691	27.6301	1.66667	0.0649796	1.10703	0.55964
0.0114943	87	28.4566	28.6993	28.114	28.8703	27.6349	1.6618	0.0648302	1.10449	0.557315
0.0114548	87.3	28.459	28.701	28.1175	28.8715	27.6397	1.65696	0.0646816	1.10196	0.555009
0.0114155	87.6	28.4614	28.7027	28.1209	28.8727	27.6444	1.65215	0.0645336	1.09943	0.55272
0.0113766	87.9	28.4638	28.7044	28.1242	28.8739	27.6491	1.64737	0.0643863	1.09692	0.55045
0.0113379	88.2	28.4662	28.7061	28.1276	28.8751	27.6538	1.64262	0.0642396	1.09443	0.548197
0.0112994	88.5	28.4686	28.7078	28.1309	28.8762	27.6585	1.6379	0.0640937	1.09194	0.545961
0.0112613	88.8	28.4709	28.7094	28.1343	28.8774	27.6631	1.63321	0.0639484	1.08946	0.543743
0.0112233	89.1	28.4733	28.7111	28.1376	28.8786	27.6677	1.62854	0.0638038	1.087	0.541542
0.0111857	89.4	28.4756	28.7127	28.1408	28.8797	27.6722	1.62391	0.0636598	1.08455	0.539358
0.0111483	89.7	28.4779	28.7144	28.1441	28.8809	27.6768	1.6193	0.0635165	1.08211	0.53719
0.0111111	90	28.4802	28.716	28.1473	28.882	27.6813	1.61471	0.0633738	1.07968	0.535039
0.0110742	90.3	28.4825	28.7176	28.1506	28.8831	27.6858	1.61016	0.0632318	1.07726	0.532905
0.0110375	90.6	28.4848	28.7192	28.1538	28.8843	27.6902	1.60563	0.0630904	1.07485	0.530786
0.0110011	90.9	28.487	28.7208	28.1569	28.8854	27.6947	1.60113	0.0629496	1.07245	0.528684
0.0109649	91.2	28.4893	28.7224	28.1601	28.8865	27.6991	1.59666	0.0628095	1.07006	0.526597
0.010929	91.5	28.4915	28.724	28.1632	28.8876	27.7034	1.59221	0.06267	1.06769	0.524526
0.0108932	91.8	28.4937	28.7255	28.1664	28.8887	27.7078	1.58779	0.0625312	1.06532	0.522471
0.0108578	92.1	28.4959	28.7271	28.1695	28.8898	27.7121	1.5834	0.0623929	1.06296	0.520431
0.0108225	92.4	28.4981	28.7286	28.1725	28.8909	27.7164	1.57903	0.0622553	1.06062	0.518405
0.0107875	92.7	28.5003	28.7302	28.1756	28.892	27.7207	1.57468	0.0621183	1.05829	0.516395
0.0107527	93	28.5025	28.7317	28.1787	28.893	27.7249	1.57036	0.0619819	1.05596	0.5144
0.0107181	93.3	28.5046	28.7332	28.1817	28.8941	27.7292	1.56607	0.0618461	1.05365	0.51242
0.0106838	93.6	28.5068	28.7347	28.1847	28.8952	27.7334	1.5618	0.0617109	1.05135	0.510454
0.0106496	93.9	28.5089	28.7362	28.1877	28.8962	27.7376	1.55755	0.0615763	1.04905	0.508502
0.0106157	94.2	28.511	28.7377	28.1907	28.8973	27.7417	1.55333	0.0614423	1.04677	0.506564
0.010582	94.5	28.5131	28.7392	28.1936	28.8983	27.7458	1.54914	0.0613089	1.0445	0.504641
0.0105485	94.8	28.5152	28.7407	28.1966	28.8993	27.7499	1.54497	0.0611761	1.04223	0.502732
0.0105152	95.1	28.5173	28.7422	28.1995	28.9004	27.754	1.54082	0.0610439	1.03998	0.500836
0.0104822	95.4	28.5194	28.7436	28.2024	28.9014	27.7581	1.53669	0.0609122	1.03774	0.498954
0.0104493	95.7	28.5214	28.7451	28.2053	28.9024	27.7621	1.53259	0.0607811	1.03551	0.497085
0.0104167	96	28.5235	28.7465	28.2082	28.9034	27.7661	1.52851	0.0606506	1.03328	0.49523
0.0103842	96.3	28.5255	28.7479	28.211	28.9044	27.7701	1.52446	0.0605207	1.03107	0.493388
0.010352	96.6	28.5275	28.7494	28.2139	28.9054	27.7741	1.52042	0.0603913	1.02886	0.491559
0.0103199	96.9	28.5295	28.7508	28.2167	28.9064	27.778	1.51641	0.0602625	1.02667	0.489743
0.0102881	97.2	28.5315	28.7522	28.2195	28.9074	27.782	1.51242	0.0601343	1.02448	0.487939
0.0102564	97.5	28.5335	28.7536	28.2223	28.9084	27.7859	1.50846	0.0600066	1.02231	0.486149
0.0102249	97.8	28.5355	28.755	28.2251	28.9094	27.7898	1.50451	0.0598794	1.02014	0.484371
0.0101937	98.1	28.5374	28.7564	28.2279	28.9103	27.7936	1.50059	0.0597528	1.01799	0.482605
0.0101626	98.4	28.5394	28.7577	28.2306	28.9113	27.7975	1.49669	0.0596268	1.01584	0.480852
0.0101317	98.7	28.5413	28.7591	28.2334	28.9123	27.8013	1.49281	0.0595013	1.0137	0.47911
0.010101	99	28.5432	28.7605	28.2361	28.9132	27.8051	1.48895	0.0593763	1.01157	0.477381
0.0100705	99.3	28.5452	28.7618	28.2388	28.9142	27.8088	1.48512	0.0592519	1.00945	0.475664
0.0100402	99.6	28.5471	28.7631	28.2415	28.9151	27.8126	1.4813	0.059128	1.00734	0.473959
0.01001	99.9	28.549	28.7645	28.2441	28.916	27.8163	1.4775	0.0590046	1.00524	0.472265
0.00998004	100.2	28.5508	28.7658	28.2468	28.917	27.82	1.47373	0.0588817	1.00315	0.470583
0.00995025	100.5	28.5527	28.7671	28.2494	28.9179	27.8237	1.46997	0.0587594	1.00106	0.468912
0.00992063	100.8	28.5546	28.7684	28.2521	28.9188	27.8274	1.46624	0.0586376	0.998986	0.467253
0.0098912	101.1	28.5564	28.7698	28.2547	28.9197	27.8311	1.46252	0.0585163	0.99692	0.465605
0.00986193	101.4	28.5583	28.7711	28.2573	28.9206	27.8347	1.45883	0.0583955	0.994862	0.463968
0.00983284	101.7	28.5601	28.7723	28.2599	28.9216	27.8383	1.45515	0.0582752	0.992813	0.462342
0.00980392	102	28.5619	28.7736	28.2624	28.9225	27.8419	1.4515	0.0581555	0.990772	0.460727
0.00977517	102.3	28.5638	28.7749	28.265	28.9234	27.8455	1.44786	0.0580362	0.988741	0.459123
0.00974659	102.6	28.5656	28.7762	28.2675	28.9242	27.849	1.44425	0.0579174	0.986717	0.457529
0.00971817	102.9	28.5674	28.7774	28.2701	28.9251	27.8526	1.44065	0.0577992	0.984702	0.455946
0.00968992	103.2	28.5691	28.7787	28.2726	28.926	27.8561	1.43707	0.0576814	0.982696	0.454374
0.00966184	103.5	28.5709	28.78	28.2751	28.9269	27.8596	1.43351	0.0575641	0.980698	0.452812
0.00963391	103.8	28.5727	28.7812	28.2776	28.9278	27.8631	1.42997	0.0574473	0.978708	0.45126
0.00960615	104.1	28.5744	28.7824	28.2801	28.9286	27.8666	1.42644	0.057331	0.976726	0.449718
0.00957854	104.4	28.5762	28.7837	28.2825	28.9295	27.87	1.42294	0.0572152	0.974753	0.448187
0.0095511	104.7	28.5779	28.7849	28.285	28.9304	27.8734	1.41945	0.0570998	0.972788	0.446665
0.00952381	105	28.5797	28.7861	28.2874	28.9312	27.8768	1.41598	0.0569849	0.970831	0.445154
0.00949668	105.3	28.5814	28.7873	28.2898	28.9321	27.8802	1.41253	0.0568705	0.968882	0.443652
0.0094697	105.6	28.5831	28.7885	28.2923	28.9329	27.8836	1.4091	0.0567566	0.966941	0.44216
0.00944287	105.9	28.5848	28.7897	28.2947	28.9337	27.887	1.40569	0.0566432	0.965008	0.440678
0.0094162	106.2	28.5865	28.7909	28.2971	28.9346	27.8903	1.40229	0.0565302	0.963083	0.439205
0.00938967	106.5	28.5882	28.7921	28.2994	28.9354	27.8936	1.39891	0.0564176	0.961166	0.437742
0.0093633	106.8	28.5898	28.7933	28.3018	28.9362	27.897	1.39554	0.0563056	0.959256	0.436288
0.00933707	107.1	28.5915	28.7945	28.3041	28.9371	27.9002	1.3922	0.0561939	0.957355	0.434843
0.00931099	107.4	28.5932	28.7956	28.3065	28.9379	27.9035	1.38887	0.0560828	0.955461	0.433407
0.00928505	107.7	28.5948	28.7968	28.3088	28.9387	27.9068	1.38556	0.0559721	0.953575	0.431981
0.00925926	108	28.5964	28.7979	28.3111	28.9395	27.91	1.38226	0.0558618	0.951696	0.430564
0.00923361	108.3	28.5981	28.7991	28.3134	28.9403	27.9132	1.37898	0.055752	0.949826	0.429155
0.0092081	108.6	28.5997	28.8002	28.3157	28.9411	27.9165	1.37572	0.0556426	0.947962	0.427755
0.00918274	108.9	28.6013	28.8014	28.318	28.9419	27.9196	1.37247	0.0555337	0.946106	0.426365
0.00915751	109.2	28.6029	28.8025	28.3203	28.9427	27.9228	1.36924	0.0554252	0.944258	0.424983
0.00913242	109.5	28.6045	28.8036	28.3225	28.9435	27.926	1.36603	0.0553171	0.942417	0.423609
0.00910747	109.8	28.6061	28.8047	28.3248	28.9443	27.9291	1.36283	0.0552095	0.940584	0.422244
0.00908265	110.1	28.6077	28.8059	28.327	28.945	27.9323	1.35965	0.0551023	0.938757	0.420888
0.00905797	110.4	28.6093	28.807	28.3292	28.9458	27.9354	1.35648	0.0549956	0.936938	0.41954
0.00903342	110.7	28.6108	28.8081	28.3314	28.9466	27.9385	1.35333	0.0548892	0.935127	0.4182
0.00900901	111	28.6124	28.8092	28.3336	28.9474	27.9416	1.35019	0.0547833	0.933322	0.416868
0.00898473	111.3	28.6139	28.8103	28.3358	28.9481	27.9446	1.34707	0.0546778	0.931525	0.415545
0.00896057	111.6	28.6155	28.8113	28.338	28.9489	27.9477	1.34396	0.0545727	0.929735	0.41423
0.00893655	111.9	28.617	28.8124	28.3402	28.9497	27.9507	1.34087	0.0544681	0.927952	0.412922
0.00891266	112.2	28.6186	28.8135	28.3423	28.9504	27.9537	1.3378	0.0543638	0.926176	0.411623
0.00888889	112.5	28.6201	28.8146	28.3445	28.9512	27.9568	1.33474	0.05426	0.924407	0.410332
0.00886525	112.8	28.6216	28.8156	28.3466	28.9519	27.9597	1.33169	0.0541566	0.922645	0.409048
0.00884173	113.1	28.6231	28.8167	28.3488	28.9526	27.9627	1.32866	0.0540535	0.920889	0.407772
0.00881834	113.4	28.6246	28.8177	28.3509	28.9534	27.9657	1.32565	0.0539509	0.919141	0.406504
0.00879507	113.7	28.6261	28.8188	28.353	28.9541	27.9686	1.32264	0.0538487	0.9174	0.405243
0.00877193	114	28.6276	28.8198	28.3551	28.9548	27.9716	1.31966	0.0537469	0.915665	0.40399
0.00874891	114.3	28.629	28.8209	28.3572	28.9556	27.9745	1.31668	0.0536455	0.913937	0.402745
0.008726	114.6	28.6305	28.8219	28.3592	28.9563	27.9774	1.31372	0.0535444	0.912216	0.401507
0.00870322	114.9	28.632	28.8229	28.3613	28.957	27.9803	1.31078	0.0534438	0.910502	0.400276
0.00868056	115.2	28.6334	28.824	28.3634	28.9577	27.9832	1.30785	0.0533436	0.908794	0.399052
0.00865801	115.5	28.6349	28.825	28.3654	28.9584	27.9861	1.30493	0.0532437	0.907093	0.397836
0.00863558	115.8	28.6363	28.826	28.3674	28.9592	27.9889	1.30202	0.0531442	0.905398	0.396627
0.00861326	116.1	28.6377	28.827	28.3695	28.9599	27.9918	1.29913	0.0530451	0.90371	0.395425
0.00859107	116.4	28.6392	28.828	28.3715	28.9606	27.9946	1.29626	0.0529464	0.902028	0.39423
0.00856898	116.7	28.6406	28.829	28.3735	28.9613	27.9974	1.2934	0.0528481	0.900353	0.393042
0.00854701	117	28.642	28.83	28.3755	28.962	28.0002	1.29055	0.0527502	0.898685	0.391861
0.00852515	117.3	28.6434	28.831	28.3775	28.9627	28.003	1.28771	0.0526526	0.897022	0.390686
0.0085034	117.6	28.6448	28.832	28.3795	28.9633	28.0058	1.28489	0.0525554	0.895366	0.389519
0.00848176	117.9	28.6462	28.8329	28.3814	28.964	28.0085	1.28207	0.0524586	0.893717	0.388358
0.00846024	118.2	28.6476	28.8339	28.3834	28.9647	28.0113	1.27928	0.0523621	0.892073	0.387204
0.00843882	118.5	28.649	28.8349	28.3853	28.9654	28.014	1.27649	0.052266	0.890436	0.386057
0.00841751	118.8	28.6503	28.8359	28.3873	28.9661	28.0167	1.27372	0.0521703	0.888805	0.384916
0.00839631	119.1	28.6517	28.8368	28.3892	28.9667	28.0195	1.27096	0.0520749	0.887181	0.383782
0.00837521	119.4	28.6531	28.8378	28.3911	28.9674	28.0222	1.26822	0.0519799	0.885562	0.382654
0.00835422	119.7	28.6544	28.8387	28.393	28.9681	28.0248	1.26548	0.0518853	0.883949	0.381533
0.00833333	120	28.6558	28.8397	28.395	28.9687	28.0275	1.26276	0.051791	0.882343	0.380418
0.00831255	120.3	28.6571	28.8406	28.3969	28.9694	28.0302	1.26005	0.051697	0.880743	0.379309
0.00829187	120.6	28.6584	28.8416	28.3987	28.9701	28.0328	1.25735	0.0516034	0.879148	0.378207
0.0082713	120.9	28.6598	28.8425	28.4006	28.9707	28.0355	1.25467	0.0515102	0.87756	0.37711
0.00825083	121.2	28.6611	28.8434	28.4025	28.9714	28.0381	1.252	0.0514173	0.875978	0.37602
0.00823045	121.5	28.6624	28.8443	28.4044	28.972	28.0407	1.24934	0.0513248	0.874401	0.374936
0.00821018	121.8	28.6637	28.8453	28.4062	28.9727	28.0433	1.24669	0.0512326	0.87283	0.373858
0.00819001	122.1	28.665	28.8462	28.4081	28.9733	28.0459	1.24405	0.0511407	0.871265	0.372786
0.00816993	122.4	28.6663	28.8471	28.4099	28.974	28.0485	1.24143	0.0510492	0.869706	0.37172
0.00814996	122.7	28.6676	28.848	28.4117	28.9746	28.0511	1.23881	0.0509581	0.868153	0.37066
0.00813008	123	28.6689	28.8489	28.4135	28.9752	28.0536	1.23621	0.0508672	0.866606	0.369606
0.0081103	123.3	28.6702	28.8498	28.4154	28.9759	28.0562	1.23362	0.0507767	0.865064	0.368558
0.00809061	123.6	28.6715	28.8507	28.4172	28.9765	28.0587	1.23104	0.0506866	0.863528	0.367515
0.00807103	123.9	28.6727	28.8516	28.419	28.9771	28.0612	1.22848	0.0505967	0.861997	0.366478
0.00805153	124.2	28.674	28.8525	28.4207	28.9777	28.0637	1.22592	0.0505072	0.860473	0.365447
0.00803213	124.5	28.6753	28.8534	28.4225	28.9783	28.0662	1.22338	0.0504181	0.858953	0.364422
0.00801282	124.8	28.6765	28.8543	28.4243	28.979	28.0687	1.22084	0.0503292	0.85744	0.363402
0.00799361	125.1	28.6778	28.8551	28.4261	28.9796	28.0712	1.21832	0.0502407	0.855932	0.362387
0.00797448	125.4	28.679	28.856	28.4278	28.9802	28.0737	1.21581	0.0501525	0.854429	0.361378
0.00795545	125.7	28.6802	28.8569	28.4296	28.9808	28.0761	1.21331	0.0500646	0.852932	0.360375
0.00793651	126	28.6815	28.8577	28.4313	28.9814	28.0786	1.21082	0.0499771	0.85144	0.359377
0.00791766	126.3	28.6827	28.8586	28.433	28.982	28.081	1.20834	0.0498898	0.849954	0.358384
0.00789889	126.6	28.6839	28.8595	28.4348	28.9826	28.0834	1.20587	0.0498029	0.848473	0.357397
0.00788022	126.9	28.6851	28.8603	28.4365	28.9832	28.0858	1.20341	0.0497163	0.846997	0.356415
0.00786164	127.2	28.6863	28.8612	28.4382	28.9838	28.0883	1.20096	0.04963	0.845527	0.355438
0.00784314	127.5	28.6875	28.862	28.4399	28.9844	28.0906	1.19853	0.049544	0.844062	0.354466
0.00782473	127.8	28.6887	28.8629	28.4416	28.985	28.093	1.1961	0.0494583	0.842602	0.3535
0.0078064	128.1	28.6899	28.8637	28.4433	28.9856	28.0954	1.19369	0.0493729	0.841148	0.352538
0.00778816	128.4	28.6911	28.8645	28.445	28.9862	28.0978	1.19128	0.0492879	0.839699	0.351582
0.00777001	128.7	28.6923	28.8654	28.4467	28.9867	28.1001	1.18889	0.0492031	0.838255	0.350631
0.00775194	129	28.6935	28.8662	28.4483	28.9873	28.1025	1.1865	0.0491187	0.836816	0.349685
0.00773395	129.3	28.6947	28.867	28.45	28.9879	28.1048	1.18413	0.0490345	0.835382	0.348743
0.00771605	129.6	28.6958	28.8678	28.4516	28.9885	28.1071	1.18176	0.0489506	0.833953	0.347807
0.00769823	129.9	28.697	28.8686	28.4533	28.989	28.1094	1.17941	0.0488671	0.83253	0.346876
0.00768049	130.2	28.6981	28.8695	28.4549	28.9896	28.1117	1.17706	0.0487838	0.831111	0.345949
0.00766284	130.5	28.6993	28.8703	28.4566	28.9902	28.114	1.17473	0.0487008	0.829698	0.345027
0.00764526	130.8	28.7004	28.8711	28.4582	28.9907	28.1163	1.1724	0.0486182	0.828289	0.34411
0.00762777	131.1	28.7016	28.8719	28.4598	28.9913	28.1186	1.17008	0.0485358	0.826886	0.343198
0.00761035	131.4	28.7027	28.8727	28.4614	28.9919	28.1209	1.16778	0.0484537	0.825487	0.342291
0.00759301	131.7	28.7039	28.8735	28.463	28.9924	28.1231	1.16548	0.0483719	0.824094	0.341388
0.00757576	132	28.705	28.8743	28.4646	28.993	28.1254	1.16319	0.0482904	0.822705	0.34049
0.00755858	132.3	28.7061	28.8751	28.4662	28.9935	28.1276	1.16092	0.0482091	0.821321	0.339596
0.00754148	132.6	28.7072	28.8758	28.4678	28.9941	28.1298	1.15865	0.0481282	0.819942	0.338707
0.00752445	132.9	28.7083	28.8766	28.4694	28.9946	28.1321	1.15639	0.0480475	0.818568	0.337822
0.00750751	133.2	28.7094	28.8774	28.4709	28.9952	28.1343	1.15414	0.0479671	0.817198	0.336943
0.00749064	133.5	28.7106	28.8782	28.4725	28.9957	28.1365	1.1519	0.047887	0.815833	0.336067
0.00747384	133.8	28.7117	28.879	28.4741	28.9962	28.1387	1.14967	0.0478072	0.814473	0.335196
0.00745712	134.1	28.7127	28.8797	28.4756	28.9968	28.1408	1.14745	0.0477277	0.813118	0.334329
0.00744048	134.4	28.7138	28.8805	28.4772	28.9973	28.143	1.14523	0.0476484	0.811768	0.333467
0.0074239	134.7	28.7149	28.8812	28.4787	28.9979	28.1452	1.14303	0.0475694	0.810422	0.332609
0.00740741	135	28.716	28.882	28.4802	28.9984	28.1473	1.14084	0.0474907	0.80908	0.331755
0.00739098	135.3	28.7171	28.8828	28.4818	28.9989	28.1495	1.13865	0.0474122	0.807744	0.330906
0.00737463	135.6	28.7182	28.8835	28.4833	28.9994	28.1516	1.13647	0.047334	0.806412	0.330061
0.00735835	135.9	28.7192	28.8843	28.4848	29	28.1538	1.1343	0.0472561	0.805084	0.32922
0.00734214	136.2	28.7203	28.885	28.4863	29.0005	28.1559	1.13214	0.0471785	0.803761	0.328383
0.00732601	136.5	28.7214	28.8858	28.4878	29.001	28.158	1.12999	0.0471011	0.802443	0.327551
0.00730994	136.8	28.7224	28.8865	28.4893	29.0015	28.1601	1.12785	0.0470239	0.801129	0.326722
0.00729395	137.1	28.7235	28.8872	28.4908	29.0021	28.1622	1.12572	0.0469471	0.79982	0.325898
0.00727802	137.4	28.7245	28.888	28.4923	29.0026	28.1643	1.12359	0.0468705	0.798515	0.325077
0.00726216	137.7	28.7255	28.8887	28.4937	29.0031	28.1664	1.12148	0.0467942	0.797214	0.324261
0.00724638	138	28.7266	28.8894	28.4952	29.0036	28.1684	1.11937	0.0467181	0.795918	0.323449
0.00723066	138.3	28.7276	28.8902	28.4967	29.0041	28.1705	1.11727	0.0466423	0.794626	0.322641
0.00721501	138.6	28.7286	28.8909	28.4981	29.0046	28.1725	1.11518	0.0465667	0.793339	0.321836
0.00719942	138.9	28.7297	28.8916	28.4996	29.0051	28.1746	1.11309	0.0464914	0.792056	0.321036
0.00718391	139.2	28.7307	28.8923	28.501	29.0056	28.1766	1.11102	0.0464163	0.790777	0.320239
0.00716846	139.5	28.7317	28.893	28.5025	29.0061	28.1787	1.10895	0.0463415	0.789503	0.319447
0.00715308	139.8	28.7327	28.8937	28.5039	29.0066	28.1807	1.10689	0.046267	0.788233	0.318658
0.00713776	140.1	28.7337	28.8945	28.5054	29.0071	28.1827	1.10484	0.0461927	0.786967	0.317873
0.00712251	140.4	28.7347	28.8952	28.5068	29.0076	28.1847	1.1028	0.0461186	0.785706	0.317091
0.00710732	140.7	28.7357	28.8959	28.5082	29.0081	28.1867	1.10076	0.0460448	0.784448	0.316314
0.0070922	141	28.7367	28.8966	28.5096	29.0086	28.1887	1.09874	0.0459713	0.783195	0.31554
0.00707714	141.3	28.7377	28.8973	28.511	29.0091	28.1907	1.09672	0.0458979	0.781946	0.31477
0.00706215	141.6	28.7387	28.898	28.5124	29.0096	28.1927	1.0947	0.0458249	0.780701	0.314004
0.00704722	141.9	28.7397	28.8987	28.5138	29.01	28.1946	1.0927	0.0457521	0.77946	0.313241
0.00703235	142.2	28.7407	28.8993	28.5152	29.0105	28.1966	1.09071	0.0456795	0.778224	0.312482
0.00701754	142.5	28.7417	28.9	28.5166	29.011	28.1985	1.08872	0.0456071	0.776991	0.311726
0.0070028	142.8	28.7426	28.9007	28.518	29.0115	28.2005	1.08674	0.045535	0.775763	0.310975
0.00698812	143.1	28.7436	28.9014	28.5194	29.012	28.2024	1.08476	0.0454631	0.774538	0.310226
0.0069735	143.4	28.7446	28.9021	28.5207	29.0124	28.2043	1.0828	0.0453915	0.773318	0.309481
0.00695894	143.7	28.7455	28.9027	28.5221	29.0129	28.2063	1.08084	0.0453201	0.772102	0.30874
0.00694444	144	28.7465	28.9034	28.5235	29.0134	28.2082	1.07889	0.045249	0.770889	0.308002
0.00693001	144.3	28.7475	28.9041	28.5248	29.0138	28.2101	1.07695	0.045178	0.769681	0.307268
0.00691563	144.6	28.7484	28.9048	28.5262	29.0143	28.212	1.07501	0.0451073	0.768476	0.306537
0.00690131	144.9	28.7494	28.9054	28.5275	29.0148	28.2139	1.07309	0.0450369	0.767276	0.305809
0.00688705	145.2	28.7503	28.9061	28.5288	29.0152	28.2158	1.07116	0.0449666	0.766079	0.305085
0.00687285	145.5	28.7512	28.9067	28.5302	29.0157	28.2177	1.06925	0.0448966	0.764887	0.304364
0.00685871	145.8	28.7522	28.9074	28.5315	29.0162	28.2195	1.06734	0.0448268	0.763698	0.303647
0.00684463	146.1	28.7531	28.9081	28.5328	29.0166	28.2214	1.06545	0.0447573	0.762513	0.302933
0.0068306	146.4	28.754	28.9087	28.5341	29.0171	28.2233	1.06355	0.0446879	0.761332	0.302222
0.00681663	146.7	28.755	28.9094	28.5355	29.0175	28.2251	1.06167	0.0446188	0.760154	0.301514
0.00680272	147	28.7559	28.91	28.5368	29.018	28.2269	1.05979	0.04455	0.758981	0.30081
0.00678887	147.3	28.7568	28.9107	28.5381	29.0184	28.2288	1.05792	0.0444813	0.757811	0.300109
0.00677507	147.6	28.7577	28.9113	28.5394	29.0189	28.2306	1.05606	0.0444129	0.756645	0.299411
0.00676133	147.9	28.7586	28.9119	28.5407	29.0193	28.2324	1.0542	0.0443446	0.755483	0.298716
0.00674764	148.2	28.7595	28.9126	28.542	29.0198	28.2343	1.05235	0.0442766	0.754324	0.298024
0.00673401	148.5	28.7605	28.9132	28.5432	29.0202	28.2361	1.05051	0.0442089	0.75317	0.297336
0.00672043	148.8	28.7614	28.9138	28.5445	29.0207	28.2379	1.04867	0.0441413	0.752019	0.296651
0.00670691	149.1	28.7623	28.9145	28.5458	29.0211	28.2397	1.04684	0.0440739	0.750871	0.295968
0.00669344	149.4	28.7631	28.9151	28.5471	29.0215	28.2415	1.04502	0.0440068	0.749727	0.295289
0.00668003	149.7	28.764	28.9157	28.5483	29.022	28.2432	1.0432	0.0439399	0.748587	0.294613
0.00666667	150	28.7649	28.9163	28.5496	29.0224	28.245	1.04139	0.0438732	0.747451	0.29394
0.00665336	150.3	28.7658	28.917	28.5508	29.0228	28.2468	1.03959	0.0438067	0.746318	0.29327
0.00664011	150.6	28.7667	28.9176	28.5521	29.0233	28.2486	1.03779	0.0437404	0.745189	0.292603
0.00662691	150.9	28.7676	28.9182	28.5533	29.0237	28.2503	1.036	0.0436743	0.744063	0.291939
0.00661376	151.2	28.7684	28.9188	28.5546	29.0241	28.2521	1.03422	0.0436085	0.742941	0.291278
0.00660066	151.5	28.7693	28.9194	28.5558	29.0246	28.2538	1.03244	0.0435428	0.741822	0.29062
0.00658762	151.8	28.7702	28.92	28.5571	29.025	28.2555	1.03067	0.0434773	0.740707	0.289965
0.00657462	152.1	28.7711	28.9206	28.5583	29.0254	28.2573	1.02891	0.0434121	0.739595	0.289313
0.00656168	152.4	28.7719	28.9213	28.5595	29.0258	28.259	1.02715	0.043347	0.738487	0.288663
0.00654879	152.7	28.7728	28.9219	28.5607	29.0263	28.2607	1.0254	0.0432822	0.737382	0.288017
0.00653595	153	28.7736	28.9225	28.5619	29.0267	28.2624	1.02365	0.0432176	0.736281	0.287373
0.00652316	153.3	28.7745	28.9231	28.5632	29.0271	28.2641	1.02192	0.0431531	0.735183	0.286732
0.00651042	153.6	28.7753	28.9236	28.5644	29.0275	28.2658	1.02018	0.0430889	0.734089	0.286094
0.00649773	153.9	28.7762	28.9242	28.5656	29.0279	28.2675	1.01846	0.0430249	0.732998	0.285459
0.00648508	154.2	28.777	28.9248	28.5668	29.0283	28.2692	1.01674	0.042961	0.731911	0.284826
0.00647249	154.5	28.7779	28.9254	28.568	29.0288	28.2709	1.01502	0.0428974	0.730826	0.284196
0.00645995	154.8	28.7787	28.926	28.5691	29.0292	28.2726	1.01332	0.0428339	0.729746	0.283569
0.00644745	155.1	28.7795	28.9266	28.5703	29.0296	28.2743	1.01161	0.0427707	0.728668	0.282945
0.00643501	155.4	28.7804	28.9272	28.5715	29.03	28.2759	1.00992	0.0427076	0.727594	0.282324
0.00642261	155.7	28.7812	28.9278	28.5727	29.0304	28.2776	1.00823	0.0426448	0.726523	0.281705
0.00641026	156	28.782	28.9283	28.5739	29.0308	28.2792	1.00654	0.0425821	0.725456	0.281089
0.00639795	156.3	28.7828	28.9289	28.575	29.0312	28.2809	1.00487	0.0425197	0.724391	0.280475
0.0063857	156.6	28.7837	28.9295	28.5762	29.0316	28.2825	1.00319	0.0424574	0.72333	0.279864
0.00637349	156.9	28.7845	28.9301	28.5773	29.032	28.2842	1.00153	0.0423953	0.722273	0.279256
0.00636132	157.2	28.7853	28.9306	28.5785	29.0324	28.2858	0.999868	0.0423334	0.721218	0.27865
0.00634921	157.5	28.7861	28.9312	28.5797	29.0328	28.2874	0.998214	0.0422717	0.720167	0.278047
0.00633714	157.8	28.7869	28.9318	28.5808	29.0332	28.289	0.996565	0.0422102	0.719119	0.277446
0.00632511	158.1	28.7877	28.9323	28.5819	29.0336	28.2907	0.994922	0.0421488	0.718074	0.276849
0.00631313	158.4	28.7885	28.9329	28.5831	29.034	28.2923	0.993285	0.0420877	0.717032	0.276253
0.0063012	158.7	28.7893	28.9335	28.5842	29.0344	28.2939	0.991654	0.0420267	0.715994	0.27566
0.00628931	159	28.7901	28.934	28.5853	29.0348	28.2955	0.990028	0.041966	0.714958	0.27507
0.00627746	159.3	28.7909	28.9346	28.5865	29.0352	28.2971	0.988408	0.0419054	0.713926	0.274482
0.00626566	159.6	28.7917	28.9351	28.5876	29.0355	28.2986	0.986793	0.041845	0.712897	0.273896
0.00625391	159.9	28.7925	28.9357	28.5887	29.0359	28.3002	0.985184	0.0417847	0.711871	0.273313
0.0062422	160.2	28.7933	28.9362	28.5898	29.0363	28.3018	0.983581	0.0417247	0.710848	0.272733
0.00623053	160.5	28.7941	28.9368	28.5909	29.0367	28.3034	0.981983	0.0416648	0.709828	0.272155
0.00621891	160.8	28.7948	28.9373	28.5921	29.0371	28.3049	0.98039	0.0416051	0.708811	0.271579
0.00620732	161.1	28.7956	28.9379	28.5932	29.0375	28.3065	0.978803	0.0415456	0.707797	0.271006
0.00619579	161.4	28.7964	28.9384	28.5943	29.0378	28.308	0.977222	0.0414863	0.706787	0.270435
0.00618429	161.7	28.7972	28.939	28.5954	29.0382	28.3096	0.975645	0.0414272	0.705779	0.269866
0.00617284	162	28.7979	28.9395	28.5964	29.0386	28.3111	0.974074	0.0413682	0.704774	0.2693
0.00616143	162.3	28.7987	28.94	28.5975	29.039	28.3127	0.972509	0.0413094	0.703772	0.268736
0.00615006	162.6	28.7995	28.9406	28.5986	29.0393	28.3142	0.970949	0.0412508	0.702774	0.268175
0.00613874	162.9	28.8002	28.9411	28.5997	29.0397	28.3157	0.969394	0.0411923	0.701778	0.267616
0.00612745	163.2	28.801	28.9416	28.6008	29.0401	28.3172	0.967844	0.041134	0.700785	0.267059
0.00611621	163.5	28.8017	28.9422	28.6019	29.0405	28.3188	0.9663	0.0410759	0.699795	0.266504
0.00610501	163.8	28.8025	28.9427	28.6029	29.0408	28.3203	0.96476	0.041018	0.698808	0.265952
0.00609385	164.1	28.8032	28.9432	28.604	29.0412	28.3218	0.963226	0.0409603	0.697824	0.265402
0.00608273	164.4	28.804	28.9437	28.6051	29.0416	28.3233	0.961697	0.0409027	0.696843	0.264854
0.00607165	164.7	28.8047	28.9443	28.6061	29.0419	28.3248	0.960174	0.0408452	0.695865	0.264309
0.00606061	165	28.8055	28.9448	28.6072	29.0423	28.3263	0.958655	0.040788	0.69489	0.263765
0.00604961	165.3	28.8062	28.9453	28.6082	29.0427	28.3278	0.957141	0.0407309	0.693917	0.263224
0.00603865	165.6	28.807	28.9458	28.6093	29.043	28.3292	0.955633	0.040674	0.692948	0.262685
0.00602773	165.9	28.8077	28.9463	28.6103	29.0434	28.3307	0.954129	0.0406173	0.691981	0.262148
0.00601685	166.2	28.8084	28.9469	28.6114	29.0437	28.3322	0.952631	0.0405607	0.691017	0.261614
0.00600601	166.5	28.8092	28.9474	28.6124	29.0441	28.3336	0.951137	0.0405043	0.690056	0.261081
0.0059952	166.8	28.8099	28.9479	28.6134	29.0445	28.3351	0.949648	0.040448	0.689097	0.260551
0.00598444	167.1	28.8106	28.9484	28.6145	29.0448	28.3366	0.948165	0.0403919	0.688142	0.260023
0.00597372	167.4	28.8113	28.9489	28.6155	29.0452	28.338	0.946686	0.040336	0.687189	0.259497
0.00596303	167.7	28.8121	28.9494	28.6165	29.0455	28.3395	0.945212	0.0402802	0.686239	0.258973
0.00595238	168	28.8128	28.9499	28.6175	29.0459	28.3409	0.943743	0.0402246	0.685292	0.258451
0.00594177	168.3	28.8135	28.9504	28.6186	29.0462	28.3423	0.942278	0.0401692	0.684347	0.257931
0.0059312	168.6	28.8142	28.9509	28.6196	29.0466	28.3438	0.940819	0.0401139	0.683405	0.257414
0.00592066	168.9	28.8149	28.9514	28.6206	29.0469	28.3452	0.939364	0.0400588	0.682466	0.256898
0.00591017	169.2	28.8156	28.9519	28.6216	29.0473	28.3466	0.937914	0.0400038	0.68153	0.256384
0.00589971	169.5	28.8163	28.9524	28.6226	29.0476	28.348	0.936469	0.039949	0.680596	0.255873
0.00588928	169.8	28.817	28.9529	28.6236	29.048	28.3495	0.935028	0.0398944	0.679665	0.255363
0.00587889	170.1	28.8177	28.9534	28.6246	29.0483	28.3509	0.933592	0.0398399	0.678737	0.254856
0.00586854	170.4	28.8184	28.9539	28.6256	29.0486	28.3523	0.932161	0.0397855	0.677811	0.25435
0.00585823	170.7	28.8191	28.9544	28.6266	29.049	28.3537	0.930734	0.0397314	0.676888	0.253846
0.00584795	171	28.8198	28.9548	28.6276	29.0493	28.3551	0.929312	0.0396773	0.675968	0.253345
0.00583771	171.3	28.8205	28.9553	28.6285	29.0497	28.3565	0.927895	0.0396235	0.67505	0.252845
0.00582751	171.6	28.8212	28.9558	28.6295	29.05	28.3579	0.926482	0.0395697	0.674135	0.252347
0.00581734	171.9	28.8219	28.9563	28.6305	29.0503	28.3592	0.925074	0.0395162	0.673222	0.251852
0.0058072	172.2	28.8226	28.9568	28.6315	29.0507	28.3606	0.92367	0.0394628	0.672312	0.251358
0.0057971	172.5	28.8233	28.9573	28.6325	29.051	28.362	0.922271	0.0394095	0.671405	0.250866
0.00578704	172.8	28.824	28.9577	28.6334	29.0513	28.3634	0.920876	0.0393564	0.6705	0.250376
0.00577701	173.1	28.8246	28.9582	28.6344	29.0517	28.3647	0.919486	0.0393034	0.669598	0.249888
0.00576701	173.4	28.8253	28.9587	28.6353	29.052	28.3661	0.9181	0.0392506	0.668698	0.249402
0.00575705	173.7	28.826	28.9592	28.6363	29.0523	28.3674	0.916718	0.039198	0.667801	0.248917
0.00574713	174	28.8267	28.9596	28.6373	29.0527	28.3688	0.915341	0.0391454	0.666906	0.248435
0.00573723	174.3	28.8273	28.9601	28.6382	29.053	28.3701	0.913968	0.0390931	0.666014	0.247954
0.00572738	174.6	28.828	28.9606	28.6392	29.0533	28.3715	0.9126	0.0390409	0.665124	0.247475
0.00571755	174.9	28.8287	28.961	28.6401	29.0537	28.3728	0.911236	0.0389888	0.664237	0.246998
0.00570776	175.2	28.8293	28.9615	28.6411	29.054	28.3742	0.909876	0.0389369	0.663353	0.246523
0.00569801	175.5	28.83	28.962	28.642	29.0543	28.3755	0.90852	0.0388851	0.66247	0.24605
0.00568828	175.8	28.8307	28.9624	28.6429	29.0546	28.3768	0.907169	0.0388334	0.661591	0.245578
0.00567859	176.1	28.8313	28.9629	28.6439	29.0549	28.3781	0.905822	0.0387819	0.660713	0.245109
0.00566893	176.4	28.832	28.9633	28.6448	29.0553	28.3795	0.904479	0.0387306	0.659838	0.244641
0.00565931	176.7	28.8326	28.9638	28.6457	29.0556	28.3808	0.903141	0.0386794	0.658966	0.244175
0.00564972	177	28.8333	28.9643	28.6467	29.0559	28.3821	0.901806	0.0386283	0.658096	0.24371
0.00564016	177.3	28.8339	28.9647	28.6476	29.0562	28.3834	0.900476	0.0385774	0.657228	0.243248
0.00563063	177.6	28.8346	28.9652	28.6485	29.0565	28.3847	0.89915	0.0385266	0.656363	0.242787
0.00562114	177.9	28.8352	28.9656	28.6494	29.0569	28.386	0.897828	0.038476	0.6555	0.242327
0.00561167	178.2	28.8359	28.9661	28.6503	29.0572	28.3873	0.89651	0.0384255	0.65464	0.24187
0.00560224	178.5	28.8365	28.9665	28.6513	29.0575	28.3886	0.895196	0.0383751	0.653782	0.241414
0.00559284	178.8	28.8371	28.967	28.6522	29.0578	28.3899	0.893886	0.0383249	0.652926	0.24096
0.00558347	179.1	28.8378	28.9674	28.6531	29.0581	28.3911	0.892581	0.0382748	0.652073	0.240508
0.00557414	179.4	28.8384	28.9679	28.654	29.0584	28.3924	0.891279	0.0382248	0.651222	0.240057
0.00556483	179.7	28.839	28.9683	28.6549	29.0587	28.3937	0.889981	0.038175	0.650373	0.239608
0.00555556	180	28.8397	28.9687	28.6558	29.059	28.395	0.888688	0.0381253	0.649527	0.239161
0.00554631	180.3	28.8403	28.9692	28.6567	29.0593	28.3962	0.887398	0.0380758	0.648683	0.238715
0.0055371	180.6	28.8409	28.9696	28.6576	29.0597	28.3975	0.886112	0.0380264	0.647841	0.238271
0.00552792	180.9	28.8416	28.9701	28.6584	29.06	28.3987	0.884831	0.0379771	0.647002	0.237829
0.00551876	181.2	28.8422	28.9705	28.6593	29.0603	28.4	0.883553	0.037928	0.646165	0.237388
0.00550964	181.5	28.8428	28.9709	28.6602	29.0606	28.4012	0.882279	0.037879	0.64533	0.236949
0.00550055	181.8	28.8434	28.9714	28.6611	29.0609	28.4025	0.881008	0.0378301	0.644497	0.236511
0.00549149	182.1	28.844	28.9718	28.662	29.0612	28.4037	0.879742	0.0377814	0.643667	0.236075
0.00548246	182.4	28.8447	28.9722	28.6629	29.0615	28.405	0.87848	0.0377328	0.642839	0.235641
0.00547345	182.7	28.8453	28.9727	28.6637	29.0618	28.4062	0.877221	0.0376843	0.642013	0.235208
0.00546448	183	28.8459	28.9731	28.6646	29.0621	28.4074	0.875966	0.0376359	0.641189	0.234777
0.00545554	183.3	28.8465	28.9735	28.6655	29.0624	28.4087	0.874715	0.0375877	0.640368	0.234348
0.00544662	183.6	28.8471	28.974	28.6663	29.0627	28.4099	0.873468	0.0375396	0.639548	0.23392
0.00543774	183.9	28.8477	28.9744	28.6672	29.063	28.4111	0.872225	0.0374917	0.638731	0.233493
0.00542888	184.2	28.8483	28.9748	28.6681	29.0633	28.4123	0.870985	0.0374438	0.637917	0.233068
0.00542005	184.5	28.8489	28.9752	28.6689	29.0636	28.4135	0.869749	0.0373961	0.637104	0.232645
0.00541126	184.8	28.8495	28.9756	28.6698	29.0639	28.4148	0.868517	0.0373486	0.636293	0.232223
0.00540249	185.1	28.8501	28.9761	28.6706	29.0641	28.416	0.867288	0.0373011	0.635485	0.231803
0.00539374	185.4	28.8507	28.9765	28.6715	29.0644	28.4172	0.866063	0.0372538	0.634679	0.231384
0.00538503	185.7	28.8513	28.9769	28.6723	29.0647	28.4184	0.864842	0.0372066	0.633875	0.230967
0.00537634	186	28.8519	28.9773	28.6732	29.065	28.4196	0.863624	0.0371595	0.633073	0.230551
0.00536769	186.3	28.8525	28.9777	28.674	29.0653	28.4207	0.86241	0.0371126	0.632273	0.230136
0.00535906	186.6	28.8531	28.9781	28.6748	29.0656	28.4219	0.861199	0.0370658	0.631476	0.229724
0.00535045	186.9	28.8537	28.9786	28.6757	29.0659	28.4231	0.859993	0.0370191	0.63068	0.229312
0.00534188	187.2	28.8543	28.979	28.6765	29.0662	28.4243	0.858789	0.0369725	0.629887	0.228902
0.00533333	187.5	28.8548	28.9794	28.6773	29.0665	28.4255	0.857589	0.0369261	0.629096	0.228494
0.00532481	187.8	28.8554	28.9798	28.6782	29.0667	28.4267	0.856393	0.0368798	0.628306	0.228087
0.00531632	188.1	28.856	28.9802	28.679	29.067	28.4278	0.855201	0.0368336	0.627519	0.227681
0.00530786	188.4	28.8566	28.9806	28.6798	29.0673	28.429	0.854011	0.0367875	0.626734	0.227277
0.00529942	188.7	28.8572	28.981	28.6806	29.0676	28.4302	0.852826	0.0367415	0.625951	0.226874
0.00529101	189	28.8577	28.9814	28.6815	29.0679	28.4313	0.851643	0.0366957	0.62517	0.226473
0.00528262	189.3	28.8583	28.9818	28.6823	29.0682	28.4325	0.850465	0.03665	0.624391	0.226073
0.00527426	189.6	28.8589	28.9822	28.6831	29.0684	28.4336	0.849289	0.0366044	0.623614	0.225675
0.00526593	189.9	28.8595	28.9826	28.6839	29.0687	28.4348	0.848117	0.0365589	0.62284	0.225278
0.00525762	190.2	28.86	28.983	28.6847	29.069	28.4359	0.846949	0.0365135	0.622067	0.224882
0.00524934	190.5	28.8606	28.9834	28.6855	29.0693	28.4371	0.845784	0.0364683	0.621296	0.224488
0.00524109	190.8	28.8612	28.9838	28.6863	29.0696	28.4382	0.844622	0.0364231	0.620527	0.224095
0.00523286	191.1	28.8617	28.9842	28.6871	29.0698	28.4393	0.843464	0.0363781	0.61976	0.223703
0.00522466	191.4	28.8623	28.9846	28.6879	29.0701	28.4405	0.842309	0.0363332	0.618996	0.223313
0.00521648	191.7	28.8629	28.985	28.6887	29.0704	28.4416	0.841157	0.0362885	0.618233	0.222924
0.00520833	192	28.8634	28.9854	28.6895	29.0707	28.4427	0.840009	0.0362438	0.617472	0.222537
0.00520021	192.3	28.864	28.9858	28.6903	29.0709	28.4439	0.838864	0.0361993	0.616713	0.222151
0.00519211	192.6	28.8645	28.9862	28.6911	29.0712	28.445	0.837722	0.0361548	0.615956	0.221766
0.00518403	192.9	28.8651	28.9865	28.6919	29.0715	28.4461	0.836584	0.0361105	0.615201	0.221383
0.00517598	193.2	28.8656	28.9869	28.6927	29.0717	28.4472	0.835449	0.0360663	0.614448	0.221
0.00516796	193.5	28.8662	28.9873	28.6935	29.072	28.4483	0.834317	0.0360222	0.613697	0.22062
0.00515996	193.8	28.8667	28.9877	28.6943	29.0723	28.4494	0.833188	0.0359783	0.612948	0.22024
0.00515198	194.1	28.8673	28.9881	28.695	29.0725	28.4505	0.832063	0.0359344	0.612201	0.219862
0.00514403	194.4	28.8678	28.9885	28.6958	29.0728	28.4516	0.83094	0.0358907	0.611455	0.219485
0.00513611	194.7	28.8684	28.9888	28.6966	29.0731	28.4527	0.829821	0.035847	0.610712	0.219109
0.00512821	195	28.8689	28.9892	28.6974	29.0733	28.4538	0.828705	0.0358035	0.609971	0.218735
0.00512033	195.3	28.8695	28.9896	28.6981	29.0736	28.4549	0.827593	0.0357601	0.609231	0.218362
0.00511247	195.6	28.87	28.99	28.6989	29.0739	28.456	0.826483	0.0357168	0.608493	0.21799
0.00510465	195.9	28.8705	28.9904	28.6997	29.0741	28.4571	0.825377	0.0356736	0.607757	0.217619
0.00509684	196.2	28.8711	28.9907	28.7004	29.0744	28.4582	0.824274	0.0356305	0.607023	0.21725
0.00508906	196.5	28.8716	28.9911	28.7012	29.0747	28.4593	0.823173	0.0355875	0.606291	0.216882
0.0050813	196.8	28.8721	28.9915	28.702	29.0749	28.4603	0.822076	0.0355447	0.605561	0.216515
0.00507357	197.1	28.8727	28.9919	28.7027	29.0752	28.4614	0.820982	0.0355019	0.604833	0.21615
0.00506586	197.4	28.8732	28.9922	28.7035	29.0754	28.4625	0.819891	0.0354593	0.604106	0.215785
0.00505817	197.7	28.8737	28.9926	28.7042	29.0757	28.4635	0.818804	0.0354167	0.603381	0.215422
0.00505051	198	28.8743	28.993	28.705	29.076	28.4646	0.817719	0.0353743	0.602658	0.21506
0.00504286	198.3	28.8748	28.9933	28.7057	29.0762	28.4657	0.816637	0.035332	0.601937	0.2147
0.00503525	198.6	28.8753	28.9937	28.7065	29.0765	28.4667	0.815558	0.0352897	0.601218	0.21434
0.00502765	198.9	28.8758	28.9941	28.7072	29.0767	28.4678	0.814483	0.0352476	0.600501	0.213982
0.00502008	199.2	28.8764	28.9944	28.708	29.077	28.4688	0.81341	0.0352056	0.599785	0.213625
0.00501253	199.5	28.8769	28.9948	28.7087	29.0772	28.4699	0.81234	0.0351637	0.599071	0.213269
0.00500501	199.8	28.8774	28.9952	28.7094	29.0775	28.4709	0.811273	0.0351219	0.598359	0.212914
0.0049975	200.1	28.8779	28.9955	28.7102	29.0777	28.472	0.810209	0.0350802	0.597649	0.212561
0.00499002	200.4	28.8784	28.9959	28.7109	29.078	28.473	0.809149	0.0350386	0.59694	0.212208
0.00498256	200.7	28.879	28.9962	28.7117	29.0782	28.4741	0.808091	0.0349972	0.596233	0.211857
0.00497512	201	28.8795	28.9966	28.7124	29.0785	28.4751	0.807036	0.0349558	0.595528	0.211507
0.00496771	201.3	28.88	28.997	28.7131	29.0787	28.4761	0.805983	0.0349145	0.594825	0.211158
0.00496032	201.6	28.8805	28.9973	28.7138	29.079	28.4772	0.804934	0.0348733	0.594124	0.210811
0.00495295	201.9	28.881	28.9977	28.7146	29.0792	28.4782	0.803888	0.0348322	0.593424	0.210464
0.0049456	202.2	28.8815	28.998	28.7153	29.0795	28.4792	0.802844	0.0347913	0.592726	0.210119
0.00493827	202.5	28.882	28.9984	28.716	29.0797	28.4802	0.801804	0.0347504	0.592029	0.209774
0.00493097	202.8	28.8825	28.9987	28.7167	29.08	28.4812	0.800766	0.0347096	0.591335	0.209431
0.00492368	203.1	28.883	28.9991	28.7174	29.0802	28.4823	0.799731	0.034669	0.590642	0.209089
0.00491642	203.4	28.8835	28.9994	28.7182	29.0805	28.4833	0.798699	0.0346284	0.589951	0.208748
0.00490918	203.7	28.884	28.9998	28.7189	29.0807	28.4843	0.79767	0.0345879	0.589261	0.208408
0.00490196	204	28.8845	29.0001	28.7196	29.081	28.4853	0.796643	0.0345476	0.588574	0.20807
0.00489476	204.3	28.885	29.0005	28.7203	29.0812	28.4863	0.795619	0.0345073	0.587887	0.207732
0.00488759	204.6	28.8855	29.0008	28.721	29.0815	28.4873	0.794598	0.0344671	0.587203	0.207395
0.00488043	204.9	28.886	29.0012	28.7217	29.0817	28.4883	0.79358	0.034427	0.58652	0.20706
0.00487329	205.2	28.8865	29.0015	28.7224	29.0819	28.4893	0.792565	0.0343871	0.585839	0.206726
0.00486618	205.5	28.887	29.0019	28.7231	29.0822	28.4903	0.791552	0.0343472	0.58516	0.206392
0.00485909	205.8	28.8875	29.0022	28.7238	29.0824	28.4913	0.790542	0.0343074	0.584482	0.20606
0.00485201	206.1	28.888	29.0026	28.7245	29.0827	28.4923	0.789535	0.0342677	0.583806	0.205729
0.00484496	206.4	28.8885	29.0029	28.7252	29.0829	28.4933	0.788531	0.0342281	0.583132	0.205399
0.00483793	206.7	28.889	29.0032	28.7259	29.0831	28.4942	0.787529	0.0341886	0.582459	0.20507
0.00483092	207	28.8894	29.0036	28.7266	29.0834	28.4952	0.78653	0.0341492	0.581788	0.204742
0.00482393	207.3	28.8899	29.0039	28.7273	29.0836	28.4962	0.785533	0.0341099	0.581118	0.204415
0.00481696	207.6	28.8904	29.0043	28.728	29.0838	28.4972	0.784539	0.0340707	0.58045	0.204089
0.00481	207.9	28.8909	29.0046	28.7286	29.0841	28.4981	0.783548	0.0340316	0.579784	0.203764
0.00480307	208.2	28.8914	29.0049	28.7293	29.0843	28.4991	0.78256	0.0339926	0.579119	0.203441
0.00479616	208.5	28.8918	29.0053	28.73	29.0845	28.5001	0.781574	0.0339537	0.578456	0.203118
0.00478927	208.8	28.8923	29.0056	28.7307	29.0848	28.501	0.780591	0.0339149	0.577795	0.202796
0.0047824	209.1	28.8928	29.0059	28.7314	29.085	28.502	0.77961	0.0338761	0.577135	0.202475
0.00477555	209.4	28.8933	29.0063	28.7321	29.0852	28.503	0.778632	0.0338375	0.576476	0.202156
0.00476872	209.7	28.8937	29.0066	28.7327	29.0855	28.5039	0.777657	0.0337989	0.57582	0.201837
0.0047619	210	28.8942	29.0069	28.7334	29.0857	28.5049	0.776684	0.0337605	0.575164	0.201519
0.00475511	210.3	28.8947	29.0073	28.7341	29.0859	28.5058	0.775713	0.0337221	0.574511	0.201203
0.00474834	210.6	28.8952	29.0076	28.7347	29.0862	28.5068	0.774746	0.0336838	0.573859	0.200887
0.00474158	210.9	28.8956	29.0079	28.7354	29.0864	28.5077	0.77378	0.0336457	0.573208	0.200572
0.00473485	211.2	28.8961	29.0083	28.7361	29.0866	28.5087	0.772818	0.0336076	0.572559	0.200259
0.00472813	211.5	28.8966	29.0086	28.7367	29.0869	28.5096	0.771858	0.0335696	0.571912	0.199946
0.00472144	211.8	28.897	29.0089	28.7374	29.0871	28.5106	0.7709	0.0335317	0.571266	0.199634
0.00471476	212.1	28.8975	29.0092	28.7381	29.0873	28.5115	0.769945	0.0334938	0.570622	0.199323
0.0047081	212.4	28.898	29.0096	28.7387	29.0875	28.5124	0.768992	0.0334561	0.569979	0.199013
0.00470146	212.7	28.8984	29.0099	28.7394	29.0878	28.5134	0.768042	0.0334185	0.569338	0.198705
0.00469484	213	28.8989	29.0102	28.74	29.088	28.5143	0.767095	0.0333809	0.568698	0.198397
0.00468823	213.3	28.8993	29.0105	28.7407	29.0882	28.5152	0.76615	0.0333435	0.56806	0.19809
0.00468165	213.6	28.8998	29.0108	28.7413	29.0884	28.5161	0.765207	0.0333061	0.567423	0.197784
0.00467508	213.9	28.9003	29.0112	28.742	29.0887	28.5171	0.764267	0.0332688	0.566788	0.197479
0.00466853	214.2	28.9007	29.0115	28.7426	29.0889	28.518	0.763329	0.0332316	0.566154	0.197175
0.004662	214.5	28.9012	29.0118	28.7433	29.0891	28.5189	0.762393	0.0331945	0.565522	0.196872
0.00465549	214.8	28.9016	29.0121	28.7439	29.0893	28.5198	0.76146	0.0331575	0.564891	0.196569
0.004649	215.1	28.9021	29.0124	28.7446	29.0895	28.5207	0.76053	0.0331205	0.564262	0.196268
0.00464253	215.4	28.9025	29.0127	28.7452	29.0898	28.5216	0.759602	0.0330837	0.563634	0.195968
0.00463607	215.7	28.903	29.0131	28.7459	29.09	28.5225	0.758676	0.0330469	0.563008	0.195668
0.00462963	216	28.9034	29.0134	28.7465	29.0902	28.5235	0.757753	0.0330102	0.562383	0.19537
0.00462321	216.3	28.9039	29.0137	28.7471	29.0904	28.5244	0.756832	0.0329736	0.56176	0.195072
0.00461681	216.6	28.9043	29.014	28.7478	29.0906	28.5253	0.755913	0.0329371	0.561138	0.194775
0.00461042	216.9	28.9048	29.0143	28.7484	29.0909	28.5262	0.754997	0.0329007	0.560517	0.19448
0.00460405	217.2	28.9052	29.0146	28.749	29.0911	28.5271	0.754083	0.0328644	0.559898	0.194185
0.0045977	217.5	28.9056	29.0149	28.7497	29.0913	28.5279	0.753171	0.0328281	0.55928	0.193891
0.00459137	217.8	28.9061	29.0152	28.7503	29.0915	28.5288	0.752262	0.032792	0.558664	0.193598
0.00458505	218.1	28.9065	29.0155	28.7509	29.0917	28.5297	0.751355	0.0327559	0.55805	0.193305
0.00457875	218.4	28.907	29.0159	28.7516	29.0919	28.5306	0.75045	0.0327199	0.557436	0.193014
0.00457247	218.7	28.9074	29.0162	28.7522	29.0921	28.5315	0.749548	0.032684	0.556824	0.192724
0.00456621	219	28.9078	29.0165	28.7528	29.0924	28.5324	0.748648	0.0326481	0.556214	0.192434
0.00455996	219.3	28.9083	29.0168	28.7534	29.0926	28.5333	0.74775	0.0326124	0.555605	0.192145
0.00455373	219.6	28.9087	29.0171	28.754	29.0928	28.5341	0.746855	0.0325767	0.554997	0.191857
0.00454752	219.9	28.9091	29.0174	28.7547	29.093	28.535	0.745961	0.0325411	0.554391	0.19157
0.00454133	220.2	28.9096	29.0177	28.7553	29.0932	28.5359	0.74507	0.0325056	0.553786	0.191284
0.00453515	220.5	28.91	29.018	28.7559	29.0934	28.5368	0.744182	0.0324702	0.553182	0.190999
0.00452899	220.8	28.9104	29.0183	28.7565	29.0936	28.5376	0.743295	0.0324349	0.55258	0.190715
0.00452284	221.1	28.9109	29.0186	28.7571	29.0938	28.5385	0.742411	0.0323996	0.55198	0.190431
0.00451671	221.4	28.9113	29.0189	28.7577	29.094	28.5394	0.741529	0.0323644	0.55138	0.190148
0.0045106	221.7	28.9117	29.0192	28.7583	29.0943	28.5402	0.740649	0.0323293	0.550782	0.189867
0.0045045	222	28.9121	29.0195	28.7589	29.0945	28.5411	0.739771	0.0322943	0.550186	0.189586
0.00449843	222.3	28.9126	29.0198	28.7595	29.0947	28.542	0.738896	0.0322594	0.54959	0.189305
0.00449236	222.6	28.913	29.0201	28.7602	29.0949	28.5428	0.738022	0.0322245	0.548997	0.189026
0.00448632	222.9	28.9134	29.0204	28.7608	29.0951	28.5437	0.737151	0.0321897	0.548404	0.188747
0.00448029	223.2	28.9138	29.0207	28.7614	29.0953	28.5445	0.736282	0.032155	0.547813	0.18847
0.00447427	223.5	28.9143	29.021	28.762	29.0955	28.5454	0.735416	0.0321204	0.547223	0.188193
0.00446828	223.8	28.9147	29.0212	28.7626	29.0957	28.5462	0.734551	0.0320858	0.546634	0.187917
0.00446229	224.1	28.9151	29.0215	28.7631	29.0959	28.5471	0.733689	0.0320514	0.546047	0.187642
0.00445633	224.4	28.9155	29.0218	28.7637	29.0961	28.5479	0.732828	0.032017	0.545461	0.187367
0.00445038	224.7	28.9159	29.0221	28.7643	29.0963	28.5487	0.73197	0.0319827	0.544877	0.187093
0.00444444	225	28.9163	29.0224	28.7649	29.0965	28.5496	0.731114	0.0319484	0.544294	0.186821
0.00443853	225.3	28.9168	29.0227	28.7655	29.0967	28.5504	0.73026	0.0319143	0.543712	0.186549
0.00443262	225.6	28.9172	29.023	28.7661	29.0969	28.5513	0.729408	0.0318802	0.543131	0.186277
0.00442674	225.9	28.9176	29.0233	28.7667	29.0971	28.5521	0.728559	0.0318462	0.542552	0.186007
0.00442087	226.2	28.918	29.0236	28.7673	29.0973	28.5529	0.727711	0.0318123	0.541974	0.185737
0.00441501	226.5	28.9184	29.0239	28.7679	29.0975	28.5538	0.726865	0.0317784	0.541397	0.185468
0.00440917	226.8	28.9188	29.0241	28.7684	29.0977	28.5546	0.726022	0.0317447	0.540822	0.1852
0.00440335	227.1	28.9192	29.0244	28.769	29.0979	28.5554	0.72518	0.031711	0.540248	0.184933
0.00439754	227.4	28.9196	29.0247	28.7696	29.0981	28.5562	0.724341	0.0316773	0.539675	0.184666
0.00439174	227.7	28.92	29.025	28.7702	29.0983	28.5571	0.723504	0.0316438	0.539103	0.184401
0.00438596	228	28.9204	29.0253	28.7708	29.0985	28.5579	0.722668	0.0316103	0.538533	0.184136
0.0043802	228.3	28.9208	29.0256	28.7713	29.0987	28.5587	0.721835	0.0315769	0.537964	0.183871
0.00437445	228.6	28.9213	29.0258	28.7719	29.0989	28.5595	0.721004	0.0315436	0.537396	0.183608
0.00436872	228.9	28.9217	29.0261	28.7725	29.0991	28.5603	0.720175	0.0315103	0.53683	0.183345
0.004363	229.2	28.9221	29.0264	28.7731	29.0993	28.5611	0.719348	0.0314772	0.536264	0.183083
0.0043573	229.5	28.9225	29.0267	28.7736	29.0995	28.5619	0.718522	0.0314441	0.5357	0.182822
0.00435161	229.8	28.9229	29.027	28.7742	29.0997	28.5627	0.717699	0.031411	0.535138	0.182561
0.00434594	230.1	28.9233	29.0272	28.7748	29.0999	28.5636	0.716878	0.0313781	0.534576	0.182302
0.00434028	230.4	28.9236	29.0275	28.7753	29.1001	28.5644	0.716059	0.0313452	0.534016	0.182043
0.00433463	230.7	28.924	29.0278	28.7759	29.1003	28.5652	0.715242	0.0313124	0.533457	0.181785
0.004329	231	28.9244	29.0281	28.7765	29.1005	28.566	0.714426	0.0312796	0.532899	0.181527
0.00432339	231.3	28.9248	29.0283	28.777	29.1006	28.5668	0.713613	0.031247	0.532343	0.18127
0.00431779	231.6	28.9252	29.0286	28.7776	29.1008	28.5676	0.712802	0.0312144	0.531787	0.181014
0.0043122	231.9	28.9256	29.0289	28.7781	29.101	28.5683	0.711992	0.0311819	0.531233	0.180759
0.00430663	232.2	28.926	29.0292	28.7787	29.1012	28.5691	0.711185	0.0311494	0.53068	0.180504
0.00430108	232.5	28.9264	29.0294	28.7793	29.1014	28.5699	0.710379	0.031117	0.530129	0.180251
0.00429553	232.8	28.9268	29.0297	28.7798	29.1016	28.5707	0.709576	0.0310847	0.529578	0.179997
0.00429	233.1	28.9272	29.03	28.7804	29.1018	28.5715	0.708774	0.0310525	0.529029	0.179745
0.00428449	233.4	28.9276	29.0303	28.7809	29.102	28.5723	0.707974	0.0310203	0.528481	0.179493
0.00427899	233.7	28.928	29.0305	28.7815	29.1022	28.5731	0.707176	0.0309882	0.527934	0.179242
0.0042735	234	28.9283	29.0308	28.782	29.1024	28.5739	0.706381	0.0309562	0.527389	0.178992
0.00426803	234.3	28.9287	29.0311	28.7826	29.1025	28.5746	0.705586	0.0309242	0.526844	0.178742
0.00426257	234.6	28.9291	29.0313	28.7831	29.1027	28.5754	0.704794	0.0308923	0.526301	0.178493
0.00425713	234.9	28.9295	29.0316	28.7837	29.1029	28.5762	0.704004	0.0308605	0.525759	0.178245
0.0042517	235.2	28.9299	29.0319	28.7842	29.1031	28.577	0.703215	0.0308288	0.525218	0.177998
0.00424628	235.5	28.9303	29.0321	28.7848	29.1033	28.5777	0.702429	0.0307971	0.524678	0.177751
0.00424088	235.8	28.9306	29.0324	28.7853	29.1035	28.5785	0.701644	0.0307655	0.524139	0.177505
0.00423549	236.1	28.931	29.0327	28.7858	29.1037	28.5793	0.700861	0.0307339	0.523602	0.177259
0.00423012	236.4	28.9314	29.0329	28.7864	29.1038	28.58	0.70008	0.0307024	0.523066	0.177015
0.00422476	236.7	28.9318	29.0332	28.7869	29.104	28.5808	0.699301	0.030671	0.522531	0.176771
0.00421941	237	28.9321	29.0335	28.7875	29.1042	28.5816	0.698524	0.0306397	0.521997	0.176527
0.00421408	237.3	28.9325	29.0337	28.788	29.1044	28.5823	0.697748	0.0306084	0.521464	0.176284
0.00420875	237.6	28.9329	29.034	28.7885	29.1046	28.5831	0.696975	0.0305772	0.520932	0.176042
0.00420345	237.9	28.9333	29.0342	28.7891	29.1048	28.5838	0.696203	0.0305461	0.520402	0.175801
0.00419815	238.2	28.9336	29.0345	28.7896	29.1049	28.5846	0.695433	0.030515	0.519872	0.17556
0.00419287	238.5	28.934	29.0348	28.7901	29.1051	28.5853	0.694664	0.030484	0.519344	0.17532
0.0041876	238.8	28.9344	29.035	28.7906	29.1053	28.5861	0.693898	0.030453	0.518817	0.175081
0.00418235	239.1	28.9348	29.0353	28.7912	29.1055	28.5868	0.693133	0.0304222	0.518291	0.174842
0.00417711	239.4	28.9351	29.0355	28.7917	29.1057	28.5876	0.69237	0.0303914	0.517766	0.174604
0.00417188	239.7	28.9355	29.0358	28.7922	29.1059	28.5883	0.691609	0.0303606	0.517242	0.174367
0.00416667	240	28.9359	29.0361	28.7928	29.106	28.5891	0.690849	0.0303299	0.51672	0.17413
0.00416146	240.3	28.9362	29.0363	28.7933	29.1062	28.5898	0.690092	0.0302993	0.516198	0.173894
0.00415628	240.6	28.9366	29.0366	28.7938	29.1064	28.5906	0.689336	0.0302688	0.515678	0.173658
0.0041511	240.9	28.937	29.0368	28.7943	29.1066	28.5913	0.688582	0.0302383	0.515158	0.173423
0.00414594	241.2	28.9373	29.0371	28.7948	29.1067	28.5921	0.687829	0.0302079	0.51464	0.173189
0.00414079	241.5	28.9377	29.0373	28.7954	29.1069	28.5928	0.687079	0.0301775	0.514123	0.172956
0.00413565	241.8	28.9381	29.0376	28.7959	29.1071	28.5935	0.68633	0.0301472	0.513607	0.172723
0.00413052	242.1	28.9384	29.0378	28.7964	29.1073	28.5943	0.685583	0.030117	0.513092	0.17249
0.00412541	242.4	28.9388	29.0381	28.7969	29.1074	28.595	0.684837	0.0300869	0.512578	0.172259
0.00412031	242.7	28.9391	29.0383	28.7974	29.1076	28.5957	0.684093	0.0300568	0.512066	0.172028
0.00411523	243	28.9395	29.0386	28.7979	29.1078	28.5964	0.683351	0.0300267	0.511554	0.171797
0.00411015	243.3	28.9399	29.0388	28.7984	29.108	28.5972	0.682611	0.0299968	0.511043	0.171568
0.00410509	243.6	28.9402	29.0391	28.799	29.1081	28.5979	0.681872	0.0299668	0.510534	0.171338
0.00410004	243.9	28.9406	29.0393	28.7995	29.1083	28.5986	0.681135	0.029937	0.510025	0.17111
0.004095	244.2	28.9409	29.0396	28.8	29.1085	28.5993	0.6804	0.0299072	0.509518	0.170882
0.00408998	244.5	28.9413	29.0398	28.8005	29.1087	28.6001	0.679666	0.0298775	0.509012	0.170655
0.00408497	244.8	28.9416	29.0401	28.801	29.1088	28.6008	0.678934	0.0298478	0.508506	0.170428
0.00407997	245.1	28.942	29.0403	28.8015	29.109	28.6015	0.678204	0.0298183	0.508002	0.170202
0.00407498	245.4	28.9423	29.0406	28.802	29.1092	28.6022	0.677475	0.0297887	0.507499	0.169976
0.00407	245.7	28.9427	29.0408	28.8025	29.1094	28.6029	0.676748	0.0297592	0.506997	0.169751
0.00406504	246	28.943	29.0411	28.803	29.1095	28.6036	0.676023	0.0297298	0.506496	0.169527
0.00406009	246.3	28.9434	29.0413	28.8035	29.1097	28.6043	0.675299	0.0297005	0.505996	0.169303
0.00405515	246.6	28.9437	29.0416	28.804	29.1099	28.6051	0.674577	0.0296712	0.505497	0.16908
0.00405022	246.9	28.9441	29.0418	28.8045	29.11	28.6058	0.673857	0.029642	0.504999	0.168858
0.00404531	247.2	28.9444	29.0421	28.805	29.1102	28.6065	0.673138	0.0296128	0.504502	0.168636
0.0040404	247.5	28.9448	29.0423	28.8055	29.1104	28.6072	0.672421	0.0295837	0.504006	0.168414
0.00403551	247.8	28.9451	29.0425	28.806	29.1105	28.6079	0.671705	0.0295547	0.503511	0.168194
0.00403063	248.1	28.9455	29.0428	28.8065	29.1107	28.6086	0.670991	0.0295257	0.503018	0.167973
0.00402576	248.4	28.9458	29.043	28.807	29.1109	28.6093	0.670279	0.0294967	0.502525	0.167754
0.00402091	248.7	28.9462	29.0433	28.8075	29.1111	28.61	0.669568	0.0294679	0.502033	0.167535
0.00401606	249	28.9465	29.0435	28.8079	29.1112	28.6107	0.668859	0.0294391	0.501542	0.167316
0.00401123	249.3	28.9469	29.0437	28.8084	29.1114	28.6114	0.668151	0.0294103	0.501053	0.167099
0.00400641	249.6	28.9472	29.044	28.8089	29.1116	28.612	0.667445	0.0293816	0.500564	0.166881
0.0040016	249.9	28.9475	29.0442	28.8094	29.1117	28.6127	0.666741	0.029353	0.500076	0.166665
0.0039968	250.2	28.9479	29.0445	28.8099	29.1119	28.6134	0.666038	0.0293244	0.499589	0.166448
0.00399202	250.5	28.9482	29.0447	28.8104	29.1121	28.6141	0.665337	0.0292959	0.499104	0.166233
0.00398724	250.8	28.9486	29.0449	28.8109	29.1122	28.6148	0.664637	0.0292675	0.498619	0.166018
0.00398248	251.1	28.9489	29.0452	28.8113	29.1124	28.6155	0.663939	0.0292391	0.498135	0.165803
0.00397772	251.4	28.9492	29.0454	28.8118	29.1125	28.6162	0.663242	0.0292107	0.497652	0.165589
0.00397298	251.7	28.9496	29.0456	28.8123	29.1127	28.6169	0.662547	0.0291825	0.497171	0.165376
0.00396825	252	28.9499	29.0459	28.8128	29.1129	28.6175	0.661853	0.0291542	0.49669	0.165163
0.00396354	252.3	28.9502	29.0461	28.8133	29.113	28.6182	0.661161	0.0291261	0.49621	0.164951
0.00395883	252.6	28.9506	29.0463	28.8137	29.1132	28.6189	0.660471	0.029098	0.495731	0.164739
0.00395413	252.9	28.9509	29.0466	28.8142	29.1134	28.6196	0.659782	0.0290699	0.495253	0.164528
0.00394945	253.2	28.9512	29.0468	28.8147	29.1135	28.6202	0.659094	0.0290419	0.494777	0.164318
0.00394477	253.5	28.9516	29.047	28.8152	29.1137	28.6209	0.658408	0.029014	0.494301	0.164108
0.00394011	253.8	28.9519	29.0473	28.8156	29.1138	28.6216	0.657724	0.0289861	0.493826	0.163898
0.00393546	254.1	28.9522	29.0475	28.8161	29.114	28.6223	0.657041	0.0289583	0.493352	0.163689
0.00393082	254.4	28.9526	29.0477	28.8166	29.1142	28.6229	0.656359	0.0289305	0.492879	0.163481
0.00392619	254.7	28.9529	29.048	28.817	29.1143	28.6236	0.655679	0.0289028	0.492407	0.163273
0.00392157	255	28.9532	29.0482	28.8175	29.1145	28.6243	0.655001	0.0288752	0.491935	0.163066
0.00391696	255.3	28.9535	29.0484	28.818	29.1146	28.6249	0.654324	0.0288476	0.491465	0.162859
0.00391236	255.6	28.9539	29.0486	28.8184	29.1148	28.6256	0.653648	0.02882	0.490996	0.162652
0.00390778	255.9	28.9542	29.0489	28.8189	29.115	28.6262	0.652974	0.0287925	0.490528	0.162447
0.0039032	256.2	28.9545	29.0491	28.8194	29.1151	28.6269	0.652302	0.0287651	0.49006	0.162241
0.00389864	256.5	28.9548	29.0493	28.8198	29.1153	28.6276	0.651631	0.0287377	0.489594	0.162037
0.00389408	256.8	28.9552	29.0496	28.8203	29.1154	28.6282	0.650961	0.0287104	0.489129	0.161833
0.00388954	257.1	28.9555	29.0498	28.8208	29.1156	28.6289	0.650293	0.0286832	0.488664	0.161629
0.003885	257.4	28.9558	29.05	28.8212	29.1158	28.6295	0.649626	0.0286559	0.4882	0.161426
0.00388048	257.7	28.9561	29.0502	28.8217	29.1159	28.6302	0.648961	0.0286288	0.487738	0.161223
0.00387597	258	28.9565	29.0505	28.8221	29.1161	28.6308	0.648297	0.0286017	0.487276	0.161021
0.00387147	258.3	28.9568	29.0507	28.8226	29.1162	28.6315	0.647634	0.0285746	0.486815	0.160819
0.00386698	258.6	28.9571	29.0509	28.823	29.1164	28.6321	0.646973	0.0285476	0.486355	0.160618
0.0038625	258.9	28.9574	29.0511	28.8235	29.1165	28.6328	0.646314	0.0285207	0.485896	0.160418
0.00385802	259.2	28.9577	29.0513	28.824	29.1167	28.6334	0.645656	0.0284938	0.485438	0.160218
0.00385356	259.5	28.9581	29.0516	28.8244	29.1168	28.6341	0.644999	0.028467	0.484981	0.160018
0.00384911	259.8	28.9584	29.0518	28.8249	29.117	28.6347	0.644344	0.0284402	0.484525	0.159819
0.00384468	260.1	28.9587	29.052	28.8253	29.1172	28.6353	0.64369	0.0284135	0.484069	0.15962
0.00384025	260.4	28.959	29.0522	28.8258	29.1173	28.636	0.643037	0.0283868	0.483615	0.159422
0.00383583	260.7	28.9593	29.0525	28.8262	29.1175	28.6366	0.642386	0.0283602	0.483161	0.159225
0.00383142	261	28.9596	29.0527	28.8267	29.1176	28.6373	0.641736	0.0283336	0.482709	0.159028
0.00382702	261.3	28.9599	29.0529	28.8271	29.1178	28.6379	0.641088	0.0283071	0.482257	0.158831
0.00382263	261.6	28.9603	29.0531	28.8276	29.1179	28.6385	0.640441	0.0282806	0.481806	0.158635
0.00381825	261.9	28.9606	29.0533	28.828	29.1181	28.6392	0.639795	0.0282542	0.481356	0.158439
0.00381388	262.2	28.9609	29.0535	28.8284	29.1182	28.6398	0.639151	0.0282278	0.480907	0.158244
0.00380952	262.5	28.9612	29.0538	28.8289	29.1184	28.6404	0.638508	0.0282015	0.480459	0.15805
0.00380518	262.8	28.9615	29.054	28.8293	29.1185	28.6411	0.637867	0.0281753	0.480011	0.157855
0.00380084	263.1	28.9618	29.0542	28.8298	29.1187	28.6417	0.637227	0.0281491	0.479565	0.157662
0.00379651	263.4	28.9621	29.0544	28.8302	29.1188	28.6423	0.636588	0.0281229	0.479119	0.157468
0.00379219	263.7	28.9624	29.0546	28.8307	29.119	28.6429	0.63595	0.0280968	0.478675	0.157276
0.00378788	264	28.9627	29.0548	28.8311	29.1191	28.6436	0.635314	0.0280708	0.478231	0.157084
0.00378358	264.3	28.963	29.0551	28.8315	29.1193	28.6442	0.63468	0.0280448	0.477788	0.156892
0.00377929	264.6	28.9633	29.0553	28.832	29.1194	28.6448	0.634046	0.0280188	0.477346	0.1567
0.00377501	264.9	28.9637	29.0555	28.8324	29.1196	28.6454	0.633414	0.0279929	0.476905	0.15651
0.00377074	265.2	28.964	29.0557	28.8328	29.1197	28.646	0.632783	0.0279671	0.476464	0.156319
0.00376648	265.5	28.9643	29.0559	28.8333	29.1199	28.6467	0.632154	0.0279413	0.476025	0.156129
0.00376223	265.8	28.9646	29.0561	28.8337	29.12	28.6473	0.631526	0.0279155	0.475586	0.15594
0.00375799	266.1	28.9649	29.0563	28.8341	29.1202	28.6479	0.630899	0.0278898	0.475148	0.155751
0.00375375	266.4	28.9652	29.0565	28.8346	29.1203	28.6485	0.630274	0.0278642	0.474711	0.155563
0.00374953	266.7	28.9655	29.0568	28.835	29.1205	28.6491	0.62965	0.0278386	0.474275	0.155375
0.00374532	267	28.9658	29.057	28.8354	29.1206	28.6497	0.629027	0.027813	0.47384	0.155187
0.00374111	267.3	28.9661	29.0572	28.8359	29.1208	28.6503	0.628405	0.0277875	0.473405	0.155
0.00373692	267.6	28.9664	29.0574	28.8363	29.1209	28.6509	0.627785	0.0277621	0.472972	0.154813
0.00373274	267.9	28.9667	29.0576	28.8367	29.121	28.6516	0.627166	0.0277367	0.472539	0.154627
0.00372856	268.2	28.967	29.0578	28.8371	29.1212	28.6522	0.626548	0.0277113	0.472107	0.154441
0.00372439	268.5	28.9673	29.058	28.8376	29.1213	28.6528	0.625932	0.027686	0.471676	0.154256
0.00372024	268.8	28.9676	29.0582	28.838	29.1215	28.6534	0.625317	0.0276607	0.471246	0.154071
0.00371609	269.1	28.9679	29.0584	28.8384	29.1216	28.654	0.624703	0.0276355	0.470816	0.153887
0.00371195	269.4	28.9682	29.0586	28.8388	29.1218	28.6546	0.624091	0.0276104	0.470388	0.153703
0.00370782	269.7	28.9685	29.0588	28.8393	29.1219	28.6552	0.623479	0.0275853	0.46996	0.153519
0.0037037	270	28.9687	29.059	28.8397	29.1221	28.6558	0.622869	0.0275602	0.469533	0.153336
0.00369959	270.3	28.969	29.0592	28.8401	29.1222	28.6564	0.622261	0.0275352	0.469107	0.153154
0.00369549	270.6	28.9693	29.0595	28.8405	29.1223	28.657	0.621653	0.0275102	0.468681	0.152972
0.0036914	270.9	28.9696	29.0597	28.8409	29.1225	28.6576	0.621047	0.0274853	0.468257	0.15279
0.00368732	271.2	28.9699	29.0599	28.8414	29.1226	28.6581	0.620442	0.0274604	0.467833	0.152609
0.00368324	271.5	28.9702	29.0601	28.8418	29.1228	28.6587	0.619838	0.0274356	0.46741	0.152428
0.00367918	271.8	28.9705	29.0603	28.8422	29.1229	28.6593	0.619236	0.0274108	0.466988	0.152247
0.00367512	272.1	28.9708	29.0605	28.8426	29.1231	28.6599	0.618634	0.0273861	0.466567	0.152067
0.00367107	272.4	28.9711	29.0607	28.843	29.1232	28.6605	0.618034	0.0273614	0.466146	0.151888
0.00366703	272.7	28.9714	29.0609	28.8434	29.1233	28.6611	0.617435	0.0273368	0.465727	0.151709
0.003663	273	28.9717	29.0611	28.8438	29.1235	28.6617	0.616838	0.0273122	0.465308	0.15153
0.00365898	273.3	28.972	29.0613	28.8442	29.1236	28.6623	0.616241	0.0272877	0.46489	0.151352
0.00365497	273.6	28.9722	29.0615	28.8447	29.1238	28.6629	0.615646	0.0272632	0.464472	0.151174
0.00365097	273.9	28.9725	29.0617	28.8451	29.1239	28.6634	0.615052	0.0272387	0.464056	0.150996
0.00364697	274.2	28.9728	29.0619	28.8455	29.124	28.664	0.61446	0.0272143	0.46364	0.150819
0.00364299	274.5	28.9731	29.0621	28.8459	29.1242	28.6646	0.613868	0.02719	0.463225	0.150643
0.00363901	274.8	28.9734	29.0623	28.8463	29.1243	28.6652	0.613278	0.0271657	0.462811	0.150467
0.00363504	275.1	28.9737	29.0625	28.8467	29.1245	28.6658	0.612689	0.0271414	0.462398	0.150291
0.00363108	275.4	28.974	29.0627	28.8471	29.1246	28.6663	0.612101	0.0271172	0.461985	0.150115
0.00362713	275.7	28.9742	29.0629	28.8475	29.1247	28.6669	0.611514	0.027093	0.461573	0.149941
0.00362319	276	28.9745	29.0631	28.8479	29.1249	28.6675	0.610928	0.0270689	0.461162	0.149766
0.00361925	276.3	28.9748	29.0633	28.8483	29.125	28.6681	0.610344	0.0270448	0.460752	0.149592
0.00361533	276.6	28.9751	29.0635	28.8487	29.1251	28.6686	0.609761	0.0270208	0.460343	0.149418
0.00361141	276.9	28.9754	29.0637	28.8491	29.1253	28.6692	0.609179	0.0269968	0.459934	0.149245
0.0036075	277.2	28.9756	29.0639	28.8495	29.1254	28.6698	0.608598	0.0269728	0.459526	0.149072
0.0036036	277.5	28.9759	29.0641	28.8499	29.1255	28.6703	0.608018	0.0269489	0.459119	0.1489
0.00359971	277.8	28.9762	29.0642	28.8503	29.1257	28.6709	0.60744	0.0269251	0.458712	0.148728
0.00359583	278.1	28.9765	29.0644	28.8507	29.1258	28.6715	0.606862	0.0269013	0.458307	0.148556
0.00359195	278.4	28.9768	29.0646	28.8511	29.126	28.672	0.606286	0.0268775	0.457902	0.148385
0.00358809	278.7	28.977	29.0648	28.8515	29.1261	28.6726	0.605711	0.0268538	0.457497	0.148214
0.00358423	279	28.9773	29.065	28.8519	29.1262	28.6732	0.605137	0.0268301	0.457094	0.148043
0.00358038	279.3	28.9776	29.0652	28.8523	29.1264	28.6737	0.604565	0.0268064	0.456691	0.147873
0.00357654	279.6	28.9779	29.0654	28.8527	29.1265	28.6743	0.603993	0.0267829	0.456289	0.147704
0.0035727	279.9	28.9781	29.0656	28.8531	29.1266	28.6748	0.603423	0.0267593	0.455888	0.147534
0.00356888	280.2	28.9784	29.0658	28.8535	29.1268	28.6754	0.602853	0.0267358	0.455488	0.147366
0.00356506	280.5	28.9787	29.066	28.8539	29.1269	28.676	0.602285	0.0267123	0.455088	0.147197
0.00356125	280.8	28.979	29.0662	28.8543	29.127	28.6765	0.601718	0.0266889	0.454689	0.147029
0.00355745	281.1	28.9792	29.0664	28.8547	29.1272	28.6771	0.601152	0.0266656	0.454291	0.146861
0.00355366	281.4	28.9795	29.0666	28.855	29.1273	28.6776	0.600587	0.0266422	0.453893	0.146694
0.00354988	281.7	28.9798	29.0667	28.8554	29.1274	28.6782	0.600024	0.0266189	0.453497	0.146527
0.0035461	282	28.9801	29.0669	28.8558	29.1276	28.6787	0.599461	0.0265957	0.453101	0.146361
0.00354233	282.3	28.9803	29.0671	28.8562	29.1277	28.6793	0.5989	0.0265725	0.452705	0.146194
0.00353857	282.6	28.9806	29.0673	28.8566	29.1278	28.6798	0.598339	0.0265493	0.452311	0.146029
0.00353482	282.9	28.9809	29.0675	28.857	29.128	28.6804	0.59778	0.0265262	0.451917	0.145863
0.00353107	283.2	28.9811	29.0677	28.8574	29.1281	28.6809	0.597222	0.0265031	0.451524	0.145698
0.00352734	283.5	28.9814	29.0679	28.8577	29.1282	28.6815	0.596665	0.0264801	0.451132	0.145534
0.00352361	283.8	28.9817	29.0681	28.8581	29.1283	28.682	0.596109	0.0264571	0.45074	0.145369
0.00351989	284.1	28.9819	29.0683	28.8585	29.1285	28.6826	0.595554	0.0264342	0.450349	0.145205
0.00351617	284.4	28.9822	29.0684	28.8589	29.1286	28.6831	0.595001	0.0264113	0.449959	0.145042
0.00351247	284.7	28.9825	29.0686	28.8593	29.1287	28.6836	0.594448	0.0263884	0.449569	0.144879
0.00350877	285	28.9827	29.0688	28.8597	29.1289	28.6842	0.593896	0.0263656	0.44918	0.144716
0.00350508	285.3	28.983	29.069	28.86	29.129	28.6847	0.593346	0.0263428	0.448792	0.144554
0.0035014	285.6	28.9833	29.0692	28.8604	29.1291	28.6853	0.592796	0.0263201	0.448405	0.144392
0.00349773	285.9	28.9835	29.0694	28.8608	29.1293	28.6858	0.592248	0.0262974	0.448018	0.14423
0.00349406	286.2	28.9838	29.0696	28.8612	29.1294	28.6863	0.591701	0.0262747	0.447632	0.144069
0.0034904	286.5	28.9841	29.0697	28.8615	29.1295	28.6869	0.591155	0.0262521	0.447247	0.143908
0.00348675	286.8	28.9843	29.0699	28.8619	29.1296	28.6874	0.590609	0.0262295	0.446862	0.143747
0.00348311	287.1	28.9846	29.0701	28.8623	29.1298	28.6879	0.590065	0.026207	0.446478	0.143587
0.00347947	287.4	28.9848	29.0703	28.8627	29.1299	28.6885	0.589522	0.0261845	0.446095	0.143427
0.00347584	287.7	28.9851	29.0705	28.863	29.13	28.689	0.58898	0.026162	0.445713	0.143268
0.00347222	288	28.9854	29.0707	28.8634	29.1302	28.6895	0.58844	0.0261396	0.445331	0.143109
0.00346861	288.3	28.9856	29.0708	28.8638	29.1303	28.6901	0.5879	0.0261173	0.44495	0.14295
0.003465	288.6	28.9859	29.071	28.8642	29.1304	28.6906	0.587361	0.0260949	0.444569	0.142791
0.00346141	288.9	28.9862	29.0712	28.8645	29.1305	28.6911	0.586823	0.0260726	0.44419	0.142633
0.00345781	289.2	28.9864	29.0714	28.8649	29.1307	28.6916	0.586286	0.0260504	0.443811	0.142476
0.00345423	289.5	28.9867	29.0716	28.8653	29.1308	28.6922	0.585751	0.0260282	0.443432	0.142318
0.00345066	289.8	28.9869	29.0717	28.8656	29.1309	28.6927	0.585216	0.026006	0.443054	0.142161
0.00344709	290.1	28.9872	29.0719	28.866	29.131	28.6932	0.584682	0.0259839	0.442677	0.142005
0.00344353	290.4	28.9874	29.0721	28.8664	29.1312	28.6937	0.58415	0.0259618	0.442301	0.141849
0.00343997	290.7	28.9877	29.0723	28.8667	29.1313	28.6943	0.583618	0.0259397	0.441925	0.141693
0.00343643	291	28.988	29.0725	28.8671	29.1314	28.6948	0.583088	0.0259177	0.44155	0.141537
0.00343289	291.3	28.9882	29.0726	28.8675	29.1315	28.6953	0.582558	0.0258958	0.441176	0.141382
0.00342936	291.6	28.9885	29.0728	28.8678	29.1317	28.6958	0.58203	0.0258738	0.440803	0.141227
0.00342583	291.9	28.9887	29.073	28.8682	29.1318	28.6963	0.581502	0.0258519	0.44043	0.141072
0.00342231	292.2	28.989	29.0732	28.8686	29.1319	28.6969	0.580975	0.0258301	0.440057	0.140918
0.0034188	292.5	28.9892	29.0733	28.8689	29.132	28.6974	0.58045	0.0258083	0.439686	0.140764
0.0034153	292.8	28.9895	29.0735	28.8693	29.1322	28.6979	0.579926	0.0257865	0.439315	0.140611
0.0034118	293.1	28.9897	29.0737	28.8696	29.1323	28.6984	0.579402	0.0257647	0.438944	0.140458
0.00340832	293.4	28.99	29.0739	28.87	29.1324	28.6989	0.57888	0.0257431	0.438575	0.140305
0.00340483	293.7	28.9902	29.074	28.8704	29.1325	28.6994	0.578358	0.0257214	0.438206	0.140152
0.00340136	294	28.9905	29.0742	28.8707	29.1326	28.6999	0.577837	0.0256998	0.437837	0.14
0.00339789	294.3	28.9907	29.0744	28.8711	29.1328	28.7004	0.577318	0.0256782	0.43747	0.139848
0.00339443	294.6	28.991	29.0746	28.8714	29.1329	28.701	0.576799	0.0256566	0.437102	0.139697
0.00339098	294.9	28.9912	29.0747	28.8718	29.133	28.7015	0.576282	0.0256351	0.436736	0.139546
0.00338753	295.2	28.9915	29.0749	28.8721	29.1331	28.702	0.575765	0.0256137	0.43637	0.139395
0.00338409	295.5	28.9917	29.0751	28.8725	29.1332	28.7025	0.57525	0.0255922	0.436005	0.139245
0.00338066	295.8	28.992	29.0753	28.8729	29.1334	28.703	0.574735	0.0255708	0.435641	0.139094
0.00337724	296.1	28.9922	29.0754	28.8732	29.1335	28.7035	0.574221	0.0255495	0.435277	0.138945
0.00337382	296.4	28.9925	29.0756	28.8736	29.1336	28.704	0.573709	0.0255282	0.434914	0.138795
0.00337041	296.7	28.9927	29.0758	28.8739	29.1337	28.7045	0.573197	0.0255069	0.434551	0.138646
0.003367	297	28.993	29.076	28.8743	29.1338	28.705	0.572686	0.0254856	0.434189	0.138497
0.00336361	297.3	28.9932	29.0761	28.8746	29.134	28.7055	0.572177	0.0254644	0.433828	0.138349
0.00336022	297.6	28.9935	29.0763	28.875	29.1341	28.706	0.571668	0.0254433	0.433467	0.1382
0.00335683	297.9	28.9937	29.0765	28.8753	29.1342	28.7065	0.57116	0.0254221	0.433107	0.138052
0.00335345	298.2	28.994	29.0766	28.8757	29.1343	28.707	0.570653	0.025401	0.432748	0.137905
0.00335008	298.5	28.9942	29.0768	28.876	29.1344	28.7075	0.570147	0.02538	0.432389	0.137758
0.00334672	298.8	28.9944	29.077	28.8764	29.1346	28.708	0.569642	0.025359	0.432031	0.137611
0.00334336	299.1	28.9947	29.0772	28.8767	29.1347	28.7085	0.569138	0.025338	0.431674	0.137464
0.00334001	299.4	28.9949	29.0773	28.8771	29.1348	28.709	0.568635	0.025317	0.431317	0.137318
0.00333667	299.7	28.9952	29.0775	28.8774	29.1349	28.7094	0.568132	0.0252961	0.430961	0.137172
0.00333333	300	28.9954	29.0777	28.8777	29.135	28.7099	0.567631	0.0252753	0.430605	0.137026
0.00333	300.3	28.9956	29.0778	28.8781	29.1352	28.7104	0.567131	0.0252544	0.43025	0.136881
0.00332668	300.6	28.9959	29.078	28.8784	29.1353	28.7109	0.566631	0.0252336	0.429896	0.136736
0.00332336	300.9	28.9961	29.0782	28.8788	29.1354	28.7114	0.566133	0.0252129	0.429542	0.136591
0.00332005	301.2	28.9964	29.0783	28.8791	29.1355	28.7119	0.565635	0.0251921	0.429189	0.136447
0.00331675	301.5	28.9966	29.0785	28.8795	29.1356	28.7124	0.565139	0.0251714	0.428836	0.136303
0.00331345	301.8	28.9968	29.0787	28.8798	29.1357	28.7129	0.564643	0.0251508	0.428484	0.136159
0.00331016	302.1	28.9971	29.0788	28.8801	29.1359	28.7134	0.564148	0.0251301	0.428133	0.136016
0.00330688	302.4	28.9973	29.079	28.8805	29.136	28.7138	0.563654	0.0251096	0.427782	0.135872
0.0033036	302.7	28.9976	29.0792	28.8808	29.1361	28.7143	0.563162	0.025089	0.427432	0.13573
0.00330033	303	28.9978	29.0793	28.8812	29.1362	28.7148	0.562669	0.0250685	0.427083	0.135587
0.00329707	303.3	28.998	29.0795	28.8815	29.1363	28.7153	0.562178	0.025048	0.426734	0.135445
0.00329381	303.6	28.9983	29.0797	28.8818	29.1364	28.7158	0.561688	0.0250276	0.426385	0.135303
0.00329056	303.9	28.9985	29.0798	28.8822	29.1365	28.7162	0.561199	0.0250072	0.426038	0.135161
0.00328731	304.2	28.9987	29.08	28.8825	29.1367	28.7167	0.56071	0.0249868	0.425691	0.13502
0.00328407	304.5	28.999	29.0802	28.8829	29.1368	28.7172	0.560223	0.0249665	0.425344	0.134879
0.00328084	304.8	28.9992	29.0803	28.8832	29.1369	28.7177	0.559736	0.0249462	0.424998	0.134738
0.00327761	305.1	28.9994	29.0805	28.8835	29.137	28.7182	0.55925	0.0249259	0.424653	0.134598
0.00327439	305.4	28.9997	29.0806	28.8839	29.1371	28.7186	0.558766	0.0249056	0.424308	0.134457
0.00327118	305.7	28.9999	29.0808	28.8842	29.1372	28.7191	0.558282	0.0248854	0.423964	0.134318
0.00326797	306	29.0001	29.081	28.8845	29.1373	28.7196	0.557799	0.0248653	0.42362	0.134178
0.00326477	306.3	29.0004	29.0811	28.8849	29.1375	28.7201	0.557316	0.0248452	0.423277	0.134039
0.00326158	306.6	29.0006	29.0813	28.8852	29.1376	28.7205	0.556835	0.0248251	0.422935	0.1339
0.00325839	306.9	29.0008	29.0815	28.8855	29.1377	28.721	0.556355	0.024805	0.422593	0.133761
0.00325521	307.2	29.0011	29.0816	28.8858	29.1378	28.7215	0.555875	0.024785	0.422252	0.133623
0.00325203	307.5	29.0013	29.0818	28.8862	29.1379	28.7219	0.555396	0.024765	0.421911	0.133485
0.00324886	307.8	29.0015	29.0819	28.8865	29.138	28.7224	0.554918	0.024745	0.421571	0.133347
0.0032457	308.1	29.0018	29.0821	28.8868	29.1381	28.7229	0.554441	0.0247251	0.421232	0.13321
0.00324254	308.4	29.002	29.0823	28.8872	29.1382	28.7233	0.553965	0.0247052	0.420893	0.133072
0.00323939	308.7	29.0022	29.0824	28.8875	29.1384	28.7238	0.55349	0.0246853	0.420555	0.132935
0.00323625	309	29.0025	29.0826	28.8878	29.1385	28.7243	0.553016	0.0246655	0.420217	0.132799
0.00323311	309.3	29.0027	29.0827	28.8881	29.1386	28.7247	0.552542	0.0246457	0.41988	0.132662
0.00322997	309.6	29.0029	29.0829	28.8885	29.1387	28.7252	0.55207	0.024626	0.419543	0.132526
0.00322685	309.9	29.0031	29.0831	28.8888	29.1388	28.7257	0.551598	0.0246062	0.419207	0.132391
0.00322373	310.2	29.0034	29.0832	28.8891	29.1389	28.7261	0.551127	0.0245866	0.418872	0.132255
0.00322061	310.5	29.0036	29.0834	28.8894	29.139	28.7266	0.550657	0.0245669	0.418537	0.13212
0.0032175	310.8	29.0038	29.0835	28.8898	29.1391	28.727	0.550188	0.0245473	0.418203	0.131985
0.0032144	311.1	29.004	29.0837	28.8901	29.1392	28.7275	0.549719	0.0245277	0.417869	0.13185
0.0032113	311.4	29.0043	29.0838	28.8904	29.1393	28.728	0.549252	0.0245081	0.417536	0.131716
0.00320821	311.7	29.0045	29.084	28.8907	29.1395	28.7284	0.548785	0.0244886	0.417203	0.131582
0.00320513	312	29.0047	29.0842	28.891	29.1396	28.7289	0.548319	0.0244691	0.416871	0.131448
0.00320205	312.3	29.0049	29.0843	28.8914	29.1397	28.7293	0.547854	0.0244496	0.416539	0.131314
0.00319898	312.6	29.0052	29.0845	28.8917	29.1398	28.7298	0.54739	0.0244302	0.416208	0.131181
0.00319591	312.9	29.0054	29.0846	28.892	29.1399	28.7302	0.546926	0.0244108	0.415878	0.131048
0.00319285	313.2	29.0056	29.0848	28.8923	29.14	28.7307	0.546464	0.0243915	0.415548	0.130916
0.00318979	313.5	29.0058	29.0849	28.8926	29.1401	28.7311	0.546002	0.0243721	0.415219	0.130783
0.00318674	313.8	29.0061	29.0851	28.893	29.1402	28.7316	0.545541	0.0243528	0.41489	0.130651
0.0031837	314.1	29.0063	29.0852	28.8933	29.1403	28.7321	0.545081	0.0243336	0.414562	0.130519
0.00318066	314.4	29.0065	29.0854	28.8936	29.1404	28.7325	0.544622	0.0243143	0.414234	0.130387
0.00317763	314.7	29.0067	29.0856	28.8939	29.1405	28.733	0.544163	0.0242951	0.413907	0.130256
0.0031746	315	29.0069	29.0857	28.8942	29.1406	28.7334	0.543706	0.024276	0.413581	0.130125
0.00317158	315.3	29.0072	29.0859	28.8945	29.1408	28.7338	0.543249	0.0242568	0.413255	0.129994
0.00316857	315.6	29.0074	29.086	28.8949	29.1409	28.7343	0.542793	0.0242377	0.412929	0.129864
0.00316556	315.9	29.0076	29.0862	28.8952	29.141	28.7347	0.542338	0.0242187	0.412604	0.129733
0.00316256	316.2	29.0078	29.0863	28.8955	29.1411	28.7352	0.541883	0.0241996	0.41228	0.129603
0.00315956	316.5	29.008	29.0865	28.8958	29.1412	28.7356	0.541429	0.0241806	0.411956	0.129474
0.00315657	316.8	29.0083	29.0866	28.8961	29.1413	28.7361	0.540977	0.0241616	0.411633	0.129344
0.00315358	317.1	29.0085	29.0868	28.8964	29.1414	28.7365	0.540525	0.0241427	0.41131	0.129215
0.0031506	317.4	29.0087	29.0869	28.8967	29.1415	28.737	0.540073	0.0241238	0.410988	0.129086
0.00314762	317.7	29.0089	29.0871	28.897	29.1416	28.7374	0.539623	0.0241049	0.410666	0.128957
0.00314465	318	29.0091	29.0872	28.8973	29.1417	28.7378	0.539173	0.024086	0.410345	0.128829
0.00314169	318.3	29.0093	29.0874	28.8977	29.1418	28.7383	0.538725	0.0240672	0.410024	0.128701
0.00313873	318.6	29.0096	29.0875	28.898	29.1419	28.7387	0.538277	0.0240484	0.409704	0.128573
0.00313578	318.9	29.0098	29.0877	28.8983	29.142	28.7392	0.537829	0.0240297	0.409384	0.128445
0.00313283	319.2	29.01	29.0878	28.8986	29.1421	28.7396	0.537383	0.0240109	0.409065	0.128318
0.00312989	319.5	29.0102	29.088	28.8989	29.1422	28.74	0.536937	0.0239922	0.408747	0.128191
0.00312695	319.8	29.0104	29.0881	28.8992	29.1423	28.7405	0.536492	0.0239736	0.408429	0.128064
0.00312402	320.1	29.0106	29.0883	28.8995	29.1424	28.7409	0.536048	0.0239549	0.408111	0.127937
0.0031211	320.4	29.0108	29.0884	28.8998	29.1425	28.7413	0.535605	0.0239363	0.407794	0.127811
0.00311818	320.7	29.0111	29.0886	28.9001	29.1426	28.7418	0.535162	0.0239178	0.407478	0.127685
0.00311526	321	29.0113	29.0887	28.9004	29.1427	28.7422	0.53472	0.0238992	0.407162	0.127559
0.00311236	321.3	29.0115	29.0889	28.9007	29.1429	28.7426	0.534279	0.0238807	0.406846	0.127433
0.00310945	321.6	29.0117	29.089	28.901	29.143	28.7431	0.533839	0.0238622	0.406531	0.127308
0.00310655	321.9	29.0119	29.0892	28.9013	29.1431	28.7435	0.5334	0.0238438	0.406217	0.127183
0.00310366	322.2	29.0121	29.0893	28.9016	29.1432	28.7439	0.532961	0.0238253	0.405903	0.127058
0.00310078	322.5	29.0123	29.0895	28.9019	29.1433	28.7444	0.532523	0.0238069	0.40559	0.126933
0.00309789	322.8	29.0125	29.0896	28.9022	29.1434	28.7448	0.532086	0.0237886	0.405277	0.126809
0.00309502	323.1	29.0127	29.0898	28.9025	29.1435	28.7452	0.531649	0.0237702	0.404965	0.126685
0.00309215	323.4	29.013	29.0899	28.9028	29.1436	28.7457	0.531214	0.0237519	0.404653	0.126561
0.00308928	323.7	29.0132	29.0901	28.9031	29.1437	28.7461	0.530779	0.0237337	0.404341	0.126437
0.00308642	324	29.0134	29.0902	28.9034	29.1438	28.7465	0.530344	0.0237154	0.40403	0.126314
0.00308356	324.3	29.0136	29.0903	28.9037	29.1439	28.7469	0.529911	0.0236972	0.40372	0.126191
0.00308071	324.6	29.0138	29.0905	28.904	29.144	28.7474	0.529478	0.023679	0.40341	0.126068
0.00307787	324.9	29.014	29.0906	28.9043	29.1441	28.7478	0.529046	0.0236609	0.403101	0.125945
0.00307503	325.2	29.0142	29.0908	28.9046	29.1442	28.7482	0.528615	0.0236427	0.402792	0.125823
0.0030722	325.5	29.0144	29.0909	28.9049	29.1443	28.7486	0.528185	0.0236246	0.402484	0.125701
0.00306937	325.8	29.0146	29.0911	28.9052	29.1444	28.749	0.527755	0.0236066	0.402176	0.125579
0.00306654	326.1	29.0148	29.0912	28.9055	29.1445	28.7495	0.527326	0.0235885	0.401869	0.125457
0.00306373	326.4	29.015	29.0914	28.9058	29.1446	28.7499	0.526898	0.0235705	0.401562	0.125336
0.00306091	326.7	29.0152	29.0915	28.9061	29.1447	28.7503	0.52647	0.0235525	0.401256	0.125215
0.0030581	327	29.0154	29.0916	28.9064	29.1448	28.7507	0.526043	0.0235346	0.40095	0.125094
0.0030553	327.3	29.0156	29.0918	28.9067	29.1449	28.7511	0.525617	0.0235167	0.400644	0.124973
0.0030525	327.6	29.0159	29.0919	28.907	29.145	28.7516	0.525192	0.0234988	0.40034	0.124853
0.00304971	327.9	29.0161	29.0921	28.9073	29.1451	28.752	0.524767	0.0234809	0.400035	0.124732
0.00304692	328.2	29.0163	29.0922	28.9075	29.1452	28.7524	0.524344	0.0234631	0.399731	0.124612
0.00304414	328.5	29.0165	29.0924	28.9078	29.1453	28.7528	0.52392	0.0234453	0.399428	0.124493
0.00304136	328.8	29.0167	29.0925	28.9081	29.1454	28.7532	0.523498	0.0234275	0.399125	0.124373
0.00303859	329.1	29.0169	29.0926	28.9084	29.1455	28.7536	0.523076	0.0234097	0.398823	0.124254
0.00303582	329.4	29.0171	29.0928	28.9087	29.1456	28.754	0.522655	0.023392	0.398521	0.124135
0.00303306	329.7	29.0173	29.0929	28.909	29.1457	28.7545	0.522235	0.0233743	0.398219	0.124016
0.0030303	330	29.0175	29.0931	28.9093	29.1458	28.7549	0.521815	0.0233566	0.397918	0.123897
0.00302755	330.3	29.0177	29.0932	28.9096	29.1459	28.7553	0.521397	0.023339	0.397618	0.123779
0.0030248	330.6	29.0179	29.0933	28.9099	29.146	28.7557	0.520978	0.0233214	0.397318	0.123661
0.00302206	330.9	29.0181	29.0935	28.9102	29.1461	28.7561	0.520561	0.0233038	0.397018	0.123543
0.00301932	331.2	29.0183	29.0936	28.9104	29.1462	28.7565	0.520144	0.0232863	0.396719	0.123425
0.00301659	331.5	29.0185	29.0938	28.9107	29.1463	28.7569	0.519728	0.0232687	0.39642	0.123308
0.00301386	331.8	29.0187	29.0939	28.911	29.1464	28.7573	0.519313	0.0232512	0.396122	0.123191
0.00301114	332.1	29.0189	29.094	28.9113	29.1465	28.7577	0.518898	0.0232338	0.395825	0.123074
0.00300842	332.4	29.0191	29.0942	28.9116	29.1465	28.7581	0.518484	0.0232163	0.395528	0.122957
0.00300571	332.7	29.0193	29.0943	28.9119	29.1466	28.7585	0.518071	0.0231989	0.395231	0.12284
0.003003	333	29.0195	29.0945	28.9121	29.1467	28.7589	0.517659	0.0231815	0.394935	0.122724
0.0030003	333.3	29.0197	29.0946	28.9124	29.1468	28.7593	0.517247	0.0231642	0.394639	0.122608
0.0029976	333.6	29.0199	29.0947	28.9127	29.1469	28.7597	0.516836	0.0231468	0.394344	0.122492
0.00299491	333.9	29.0201	29.0949	28.913	29.147	28.7602	0.516425	0.0231295	0.394049	0.122376
0.00299222	334.2	29.0203	29.095	28.9133	29.1471	28.7606	0.516015	0.0231122	0.393754	0.122261
0.00298954	334.5	29.0205	29.0951	28.9136	29.1472	28.761	0.515606	0.023095	0.39346	0.122146
0.00298686	334.8	29.0207	29.0953	28.9138	29.1473	28.7614	0.515198	0.0230778	0.393167	0.122031
0.00298418	335.1	29.0209	29.0954	28.9141	29.1474	28.7618	0.51479	0.0230606	0.392874	0.121916
0.00298151	335.4	29.0211	29.0956	28.9144	29.1475	28.7622	0.514383	0.0230434	0.392582	0.121802
0.00297885	335.7	29.0212	29.0957	28.9147	29.1476	28.7626	0.513977	0.0230263	0.39229	0.121687
0.00297619	336	29.0214	29.0958	28.915	29.1477	28.7629	0.513571	0.0230091	0.391998	0.121573
0.00297354	336.3	29.0216	29.096	28.9152	29.1478	28.7633	0.513166	0.022992	0.391707	0.121459
0.00297089	336.6	29.0218	29.0961	28.9155	29.1479	28.7637	0.512762	0.022975	0.391416	0.121346
0.00296824	336.9	29.022	29.0962	28.9158	29.148	28.7641	0.512358	0.022958	0.391126	0.121232
0.0029656	337.2	29.0222	29.0964	28.9161	29.1481	28.7645	0.511955	0.0229409	0.390836	0.121119
0.00296296	337.5	29.0224	29.0965	28.9163	29.1482	28.7649	0.511553	0.022924	0.390547	0.121006
0.00296033	337.8	29.0226	29.0966	28.9166	29.1483	28.7653	0.511151	0.022907	0.390258	0.120893
0.0029577	338.1	29.0228	29.0968	28.9169	29.1484	28.7657	0.51075	0.0228901	0.38997	0.120781
0.00295508	338.4	29.023	29.0969	28.9172	29.1485	28.7661	0.51035	0.0228732	0.389682	0.120668
0.00295247	338.7	29.0232	29.097	28.9175	29.1485	28.7665	0.50995	0.0228563	0.389394	0.120556
0.00294985	339	29.0234	29.0972	28.9177	29.1486	28.7669	0.509551	0.0228394	0.389107	0.120444
0.00294724	339.3	29.0236	29.0973	28.918	29.1487	28.7673	0.509153	0.0228226	0.38882	0.120333
0.00294464	339.6	29.0238	29.0974	28.9183	29.1488	28.7677	0.508755	0.0228058	0.388534	0.120221
0.00294204	339.9	29.0239	29.0976	28.9185	29.1489	28.7681	0.508358	0.0227891	0.388248	0.12011
0.00293945	340.2	29.0241	29.0977	28.9188	29.149	28.7684	0.507962	0.0227723	0.387963	0.119999
0.00293686	340.5	29.0243	29.0978	28.9191	29.1491	28.7688	0.507566	0.0227556	0.387678	0.119888
0.00293427	340.8	29.0245	29.098	28.9194	29.1492	28.7692	0.507171	0.0227389	0.387394	0.119777
0.00293169	341.1	29.0247	29.0981	28.9196	29.1493	28.7696	0.506777	0.0227222	0.38711	0.119667
0.00292912	341.4	29.0249	29.0982	28.9199	29.1494	28.77	0.506383	0.0227056	0.386826	0.119556
0.00292654	341.7	29.0251	29.0984	28.9202	29.1495	28.7704	0.50599	0.022689	0.386543	0.119446
0.00292398	342	29.0253	29.0985	28.9204	29.1496	28.7708	0.505597	0.0226724	0.386261	0.119337
0.00292141	342.3	29.0255	29.0986	28.9207	29.1497	28.7712	0.505206	0.0226558	0.385979	0.119227
0.00291886	342.6	29.0257	29.0988	28.921	29.1497	28.7715	0.504814	0.0226393	0.385697	0.119118
0.0029163	342.9	29.0258	29.0989	28.9213	29.1498	28.7719	0.504424	0.0226228	0.385415	0.119008
0.00291375	343.2	29.026	29.099	28.9215	29.1499	28.7723	0.504034	0.0226063	0.385135	0.118899
0.00291121	343.5	29.0262	29.0992	28.9218	29.15	28.7727	0.503645	0.0225898	0.384854	0.118791
0.00290867	343.8	29.0264	29.0993	28.9221	29.1501	28.7731	0.503256	0.0225734	0.384574	0.118682
0.00290613	344.1	29.0266	29.0994	28.9223	29.1502	28.7734	0.502868	0.022557	0.384294	0.118574
0.0029036	344.4	29.0268	29.0996	28.9226	29.1503	28.7738	0.502481	0.0225406	0.384015	0.118465
0.00290107	344.7	29.027	29.0997	28.9229	29.1504	28.7742	0.502094	0.0225242	0.383736	0.118357
0.00289855	345	29.0271	29.0998	28.9231	29.1505	28.7746	0.501708	0.0225079	0.383458	0.11825
0.00289603	345.3	29.0273	29.0999	28.9234	29.1506	28.775	0.501322	0.0224916	0.38318	0.118142
0.00289352	345.6	29.0275	29.1001	28.9236	29.1507	28.7753	0.500937	0.0224753	0.382903	0.118035
0.00289101	345.9	29.0277	29.1002	28.9239	29.1507	28.7757	0.500553	0.022459	0.382626	0.117927
0.0028885	346.2	29.0279	29.1003	28.9242	29.1508	28.7761	0.500169	0.0224428	0.382349	0.11782
0.002886	346.5	29.0281	29.1005	28.9244	29.1509	28.7765	0.499786	0.0224266	0.382073	0.117714
0.00288351	346.8	29.0283	29.1006	28.9247	29.151	28.7768	0.499404	0.0224104	0.381797	0.117607
0.00288101	347.1	29.0284	29.1007	28.925	29.1511	28.7772	0.499022	0.0223942	0.381522	0.117501
0.00287853	347.4	29.0286	29.1008	28.9252	29.1512	28.7776	0.498641	0.0223781	0.381247	0.117394
0.00287604	347.7	29.0288	29.101	28.9255	29.1513	28.778	0.498261	0.022362	0.380972	0.117288
0.00287356	348	29.029	29.1011	28.9258	29.1514	28.7783	0.497881	0.0223459	0.380698	0.117183
0.00287109	348.3	29.0292	29.1012	28.926	29.1515	28.7787	0.497501	0.0223298	0.380424	0.117077
0.00286862	348.6	29.0294	29.1014	28.9263	29.1515	28.7791	0.497123	0.0223138	0.380151	0.116972
0.00286615	348.9	29.0295	29.1015	28.9265	29.1516	28.7794	0.496745	0.0222978	0.379878	0.116866
0.00286369	349.2	29.0297	29.1016	28.9268	29.1517	28.7798	0.496367	0.0222818	0.379606	0.116761
0.00286123	349.5	29.0299	29.1017	28.9271	29.1518	28.7802	0.49599	0.0222658	0.379334	0.116656
0.00285878	349.8	29.0301	29.1019	28.9273	29.1519	28.7806	0.495614	0.0222498	0.379062	0.116552
0.00285633	350.1	29.0303	29.102	28.9276	29.152	28.7809	0.495238	0.0222339	0.378791	0.116447
0.00285388	350.4	29.0304	29.1021	28.9278	29.1521	28.7813	0.494863	0.022218	0.37852	0.116343
0.00285144	350.7	29.0306	29.1022	28.9281	29.1522	28.7817	0.494489	0.0222022	0.37825	0.116239
0.002849	351	29.0308	29.1024	28.9283	29.1522	28.782	0.494115	0.0221863	0.37798	0.116135
0.00284657	351.3	29.031	29.1025	28.9286	29.1523	28.7824	0.493742	0.0221705	0.37771	0.116031
0.00284414	351.6	29.0312	29.1026	28.9289	29.1524	28.7828	0.493369	0.0221547	0.377441	0.115928
0.00284172	351.9	29.0313	29.1027	28.9291	29.1525	28.7831	0.492997	0.0221389	0.377172	0.115825
0.0028393	352.2	29.0315	29.1029	28.9294	29.1526	28.7835	0.492625	0.0221232	0.376904	0.115721
0.00283688	352.5	29.0317	29.103	28.9296	29.1527	28.7838	0.492254	0.0221074	0.376636	0.115618
0.00283447	352.8	29.0319	29.1031	28.9299	29.1528	28.7842	0.491884	0.0220917	0.376368	0.115516
0.00283206	353.1	29.032	29.1032	28.9301	29.1529	28.7846	0.491514	0.022076	0.376101	0.115413
0.00282965	353.4	29.0322	29.1034	28.9304	29.1529	28.7849	0.491145	0.0220604	0.375835	0.115311
0.00282725	353.7	29.0324	29.1035	28.9306	29.153	28.7853	0.490777	0.0220448	0.375568	0.115209
0.00282486	354	29.0326	29.1036	28.9309	29.1531	28.7857	0.490409	0.0220291	0.375302	0.115107
0.00282247	354.3	29.0328	29.1037	28.9311	29.1532	28.786	0.490041	0.0220136	0.375037	0.115005
0.00282008	354.6	29.0329	29.1038	28.9314	29.1533	28.7864	0.489675	0.021998	0.374771	0.114903
0.0028177	354.9	29.0331	29.104	28.9316	29.1534	28.7867	0.489308	0.0219825	0.374507	0.114802
0.00281532	355.2	29.0333	29.1041	28.9319	29.1535	28.7871	0.488943	0.0219669	0.374242	0.1147
0.00281294	355.5	29.0335	29.1042	28.9321	29.1535	28.7875	0.488578	0.0219514	0.373978	0.114599
0.00281057	355.8	29.0336	29.1043	28.9324	29.1536	28.7878	0.488213	0.021936	0.373715	0.114498
0.0028082	356.1	29.0338	29.1045	28.9326	29.1537	28.7882	0.487849	0.0219205	0.373452	0.114398
0.00280584	356.4	29.034	29.1046	28.9329	29.1538	28.7885	0.487486	0.0219051	0.373189	0.114297
0.00280348	356.7	29.0342	29.1047	28.9331	29.1539	28.7889	0.487123	0.0218897	0.372926	0.114197
0.00280112	357	29.0343	29.1048	28.9334	29.154	28.7892	0.486761	0.0218743	0.372664	0.114097
0.00279877	357.3	29.0345	29.1049	28.9336	29.1541	28.7896	0.486399	0.021859	0.372403	0.113997
0.00279642	357.6	29.0347	29.1051	28.9339	29.1541	28.7899	0.486038	0.0218436	0.372141	0.113897
0.00279408	357.9	29.0349	29.1052	28.9341	29.1542	28.7903	0.485678	0.0218283	0.371881	0.113797
0.00279174	358.2	29.035	29.1053	28.9344	29.1543	28.7906	0.485318	0.021813	0.37162	0.113698
0.0027894	358.5	29.0352	29.1054	28.9346	29.1544	28.791	0.484958	0.0217977	0.37136	0.113598
0.00278707	358.8	29.0354	29.1056	28.9349	29.1545	28.7914	0.4846	0.0217825	0.3711	0.113499
0.00278474	359.1	29.0355	29.1057	28.9351	29.1546	28.7917	0.484241	0.0217673	0.370841	0.1134
0.00278242	359.4	29.0357	29.1058	28.9354	29.1546	28.7921	0.483884	0.0217521	0.370582	0.113302
0.00278009	359.7	29.0359	29.1059	28.9356	29.1547	28.7924	0.483526	0.0217369	0.370323	0.113203
0.00277778	360	29.0361	29.106	28.9359	29.1548	28.7928	0.48317	0.0217218	0.370065	0.113105
0.00277546	360.3	29.0362	29.1061	28.9361	29.1549	28.7931	0.482814	0.0217066	0.369807	0.113006
0.00277316	360.6	29.0364	29.1063	28.9364	29.155	28.7935	0.482458	0.0216915	0.36955	0.112908
0.00277085	360.9	29.0366	29.1064	28.9366	29.1551	28.7938	0.482103	0.0216764	0.369293	0.11281
0.00276855	361.2	29.0367	29.1065	28.9368	29.1551	28.7941	0.481749	0.0216614	0.369036	0.112713
0.00276625	361.5	29.0369	29.1066	28.9371	29.1552	28.7945	0.481395	0.0216463	0.36878	0.112615
0.00276396	361.8	29.0371	29.1067	28.9373	29.1553	28.7948	0.481042	0.0216313	0.368524	0.112518
0.00276167	362.1	29.0373	29.1069	28.9376	29.1554	28.7952	0.480689	0.0216163	0.368269	0.112421
0.00275938	362.4	29.0374	29.107	28.9378	29.1555	28.7955	0.480337	0.0216013	0.368013	0.112324
0.0027571	362.7	29.0376	29.1071	28.9381	29.1555	28.7959	0.479985	0.0215864	0.367759	0.112227
0.00275482	363	29.0378	29.1072	28.9383	29.1556	28.7962	0.479634	0.0215714	0.367504	0.11213
0.00275255	363.3	29.0379	29.1073	28.9385	29.1557	28.7966	0.479284	0.0215565	0.36725	0.112034
0.00275028	363.6	29.0381	29.1074	28.9388	29.1558	28.7969	0.478934	0.0215416	0.366997	0.111937
0.00274801	363.9	29.0383	29.1076	28.939	29.1559	28.7973	0.478584	0.0215268	0.366743	0.111841
0.00274574	364.2	29.0384	29.1077	28.9393	29.156	28.7976	0.478235	0.0215119	0.36649	0.111745
0.00274348	364.5	29.0386	29.1078	28.9395	29.156	28.7979	0.477887	0.0214971	0.366238	0.111649
0.00274123	364.8	29.0388	29.1079	28.9397	29.1561	28.7983	0.477539	0.0214823	0.365986	0.111554
0.00273898	365.1	29.0389	29.108	28.94	29.1562	28.7986	0.477192	0.0214675	0.365734	0.111458
0.00273673	365.4	29.0391	29.1081	28.9402	29.1563	28.799	0.476845	0.0214527	0.365482	0.111363
0.00273448	365.7	29.0393	29.1083	28.9405	29.1564	28.7993	0.476499	0.021438	0.365231	0.111268
0.00273224	366	29.0394	29.1084	28.9407	29.1564	28.7996	0.476153	0.0214233	0.36498	0.111173
0.00273	366.3	29.0396	29.1085	28.9409	29.1565	28.8	0.475808	0.0214086	0.36473	0.111078
0.00272777	366.6	29.0398	29.1086	28.9412	29.1566	28.8003	0.475463	0.0213939	0.36448	0.110983
0.00272554	366.9	29.0399	29.1087	28.9414	29.1567	28.8006	0.475119	0.0213793	0.36423	0.110889
0.00272331	367.2	29.0401	29.1088	28.9416	29.1568	28.801	0.474775	0.0213646	0.363981	0.110794
0.00272109	367.5	29.0403	29.109	28.9419	29.1568	28.8013	0.474432	0.02135	0.363732	0.1107
0.00271887	367.8	29.0404	29.1091	28.9421	29.1569	28.8017	0.47409	0.0213354	0.363484	0.110606
0.00271665	368.1	29.0406	29.1092	28.9423	29.157	28.802	0.473748	0.0213209	0.363235	0.110512
0.00271444	368.4	29.0408	29.1093	28.9426	29.1571	28.8023	0.473406	0.0213063	0.362988	0.110419
0.00271223	368.7	29.0409	29.1094	28.9428	29.1572	28.8027	0.473065	0.0212918	0.36274	0.110325
0.00271003	369	29.0411	29.1095	28.943	29.1572	28.803	0.472725	0.0212773	0.362493	0.110232
0.00270783	369.3	29.0412	29.1096	28.9433	29.1573	28.8033	0.472385	0.0212628	0.362246	0.110139
0.00270563	369.6	29.0414	29.1098	28.9435	29.1574	28.8037	0.472045	0.0212483	0.362	0.110046
0.00270343	369.9	29.0416	29.1099	28.9437	29.1575	28.804	0.471706	0.0212339	0.361754	0.109953
0.00270124	370.2	29.0417	29.11	28.944	29.1576	28.8043	0.471368	0.0212195	0.361508	0.10986
0.00269906	370.5	29.0419	29.1101	28.9442	29.1576	28.8047	0.47103	0.0212051	0.361263	0.109767
0.00269687	370.8	29.0421	29.1102	28.9444	29.1577	28.805	0.470693	0.0211907	0.361018	0.109675

## Sheet: FreundlichIsotherm(Numerical)
This worksheet will help to obtain the site energy distribution spectra of porous materials based on the adsorption isotherm parameters obtained from a Freundlich isotherm
									.(1)	The methods described here same as to the ones in the sheet 'Langmuir-Freundlich(Numerical)'
Model isotherm: Freundlich Isotherm										The only difference is the isotherm qh is replaced by a Freundlich expression, the user can double click on the cells to know the details
The Freundlich isotherm constants includes (KF and n)
a/(a-10^2	6			Kf	19.551
a	1.5			n	0.5309
	Ce		qh			qh(aCe)	qh(Ce/a)	qh(a^2*Ce))	qh(Ce/a^2)
K = 1/Ce	Ce	logF,m>	qh,experimental	qh,predicted	qh/Ce	B(aF)	B(F/a)	B(a2F)	B(F/a2)				N(K)
346.274	0.00288789	-2.53942	0.991553	0.876982	303.676	1.08762	0.707138	1.34885	0.570187	1.08036	0.0176988	0.301528	0.778831
148.252	0.00674528	-2.171	1.55087	1.37589	203.979	1.70636	1.10943	2.11621	0.894564	1.69497	0.0277676	0.473067	1.2219
64.9815	0.015389	-1.81279	2.25752	2.13186	138.532	2.6439	1.71898	3.27893	1.38607	2.62625	0.0430242	0.732987	1.89326
42.5118	0.0235229	-1.62851	2.83033	2.6705	113.528	3.31192	2.15331	4.1074	1.73628	3.28981	0.0538948	0.918185	2.37162
27.8144	0.0359526	-1.44427	3.25657	3.34508	93.0414	4.14852	2.69724	5.14493	2.17487	4.12082	0.0675087	1.15012	2.9707
16.9582	0.0589685	-1.22938	3.53398	4.35002	73.7685	5.39483	3.50755	6.6906	2.82825	5.35881	0.08779	1.49564	3.86317
11.6279	0.0860003	-1.0655	4.40144	5.3149	61.8009	6.59146	4.28557	8.17464	3.45558	6.54745	0.107263	1.82739	4.72006
8.55667	0.116868	-0.932305	5.27116	6.25473	53.5196	7.75702	5.04338	9.62015	4.06663	7.70523	0.12623	2.15053	5.5547
5.72921	0.174544	-0.758095	6.57761	7.7392	44.3396	9.59805	6.24036	11.9034	5.03179	9.53397	0.156189	2.66093	6.87303
4.1141	0.243066	-0.614275	9.20551	9.22678	37.9599	11.4429	7.43984	14.1914	5.99897	11.3665	0.186211	3.1724	8.19413
2.81879	0.354763	-0.450062	11.5388	11.278	31.7902	13.9868	9.09378	17.3462	7.33259	13.8934	0.227607	3.87765	10.0157
2.0243	0.493998	-0.306275	14.0201	13.4452	27.2171	16.6746	10.8413	20.6796	8.74166	16.5632	0.271345	4.6228	11.9404
1.48783	0.672122	-0.172552	17.235	15.8329	23.5566	19.6358	12.7666	24.352	10.2941	19.5047	0.319532	5.44375	14.0609
1.17441	0.851493	-0.069819	19.133	17.9516	21.0824	22.2633	14.4749	27.6106	11.6715	22.1146	0.36229	6.17219	15.9424
0.971581	1.02925	0.0125212	21.3257	19.8526	19.2884	24.6209	16.0077	30.5345	12.9075	24.4565	0.400655	6.8258	17.6307
0.731282	1.36746	0.135915	24.1017	23.0848	16.8815	28.6295	18.614	35.5059	15.009	28.4383	0.465886	7.93713	20.5012
0.537315	1.86111	0.269771	27.9029	27.1888	14.609	33.7192	21.9232	41.8181	17.6773	33.4941	0.548712	9.34819	24.1459
0.444279	2.25084	0.352344	31.1216	30.0766	13.3624	37.3006	24.2517	46.2596	19.5549	37.0515	0.606991	10.3411	26.7104
0.358745	2.78749	0.445214	34.6327	33.6925	12.087	41.785	27.1673	51.8211	21.9058	41.5059	0.679966	11.5843	29.9216
0.289812	3.45052	0.537884	37.2644	37.7339	10.9357	46.797	30.426	58.037	24.5334	46.4846	0.761527	12.9739	33.5107
0.26977	3.70687	0.569007	39.1676	39.1972	10.5742	48.6118	31.6059	60.2877	25.4848	48.2872	0.791059	13.477	34.8102
																									0

## Sheet: Freundlich(Condensation approx)
This worksheet will help to obtain the site energy distribution spectra of porous materials based on the adsorption isotherm parameters obtained from a Freundlich isotherm using the function based on the condensation approximation method
									.(1)	The methods described here same as to the ones in the sheet 'Langmuir-Freundlich(Numerical)'
Model isotherm: Freundlich Isotherm									.(2)	Estimation of site enery distribution is so simple, once we have the isotherm constants, all we need is to substitute in the f(E*) expression shown
The Freundlich isotherm constants includes (KF and n)
b	0.5
qm	19.551
n	0.5309
ps	1
R	8.314
T	77	K
p	E*	f(E*)
0	#NUM!	#NUM!		This means, it requires infinite amount of energy to pull a molecule from a bulk phase at zero pressure
0.05	1917.8	0.00228743
0.1	1474.06	0.00330494
0.15	1214.49	0.00409875
0.2	1030.33	0.00477508
0.25	887.475	0.00537564
0.3	770.757	0.00592199
0.35	672.073	0.00642702
0.4	586.589	0.00689918
0.45	511.187	0.00734437
0.5	443.738	0.00776689
0.55	382.722	0.00817001
0.6	327.019	0.00855627
0.65	275.778	0.00892771
0.7	228.335	0.00928596
0.75	184.168	0.00963239
0.8	142.852	0.00996815
0.85	104.041	0.0102942
0.9	67.4495	0.0106114
0.95	32.8368	0.0109204
1	-1.42148e-13	0.0112218

## Sheet: virial isotherm
				This sheet shows how to get the virial isotherm constants
				we used a non-linear regression analysis to obtain the virial isotherm constants k, A1,A2
				Fig(a) we showed the method to obtain the Henry isotherm constants; this should be equivanet to the slope in the plot#
				In Figure (a), we considered only the initial values that covers the surface at lower pressures, assuming no solute-solute interactions in theseregions
				Fiig(b) shows the experimental q/p versus theoreticall predicted q/p; the error difference between q/p experimental and q/p theoretical is mininimized using the error funtion SSE (see cell H28 in the worksheet). It is possible to use other error functions,
				Fig (c ) showing the experiment and predicted isotherm just visuallization purpose, see how the predicted values are obtained (cells i16-130) in worksheet
					k	0.453074			These three constants need some initial guess values, for k we can use the slope in Figure a, for A1 and A2 in this calulation we started with an initial guess value of -0.1 and 0
					A1	-0.283962	A2	-0.0658135
										In this worksheet we used the virial exression shown in grey box, ofcourse it is possible to use other type of expressions shown in the manuscript. Irrespective of the type of expression we use
										the idea is to minimize the error distribution between experimental and the predicted ones using virial expression
		Experimental……………………………………….				predicted using virianexpression
		p	q	ln(p/q)	q/p	q/p,predicted	errsq	q,virialexpression
		0.5	0.8	-0.470004	1.6	1.68609	0.00741076	0.843043
		1	1.33333	-0.287682	1.33333	1.34458	0.000126503	1.34458
		1.5	1.71429	-0.133531	1.14286	1.11795	0.000620353	1.67693
		2	2	0	1	0.961291	0.00149838	1.92258
		2.5	2.22222	0.117783	0.888889	0.848461	0.00163445	2.12115
		3	2.4	0.223144	0.8	0.764224	0.00127994	2.29267
		3.5	2.54545	0.318454	0.727273	0.699394	0.000777197	2.44788
		4	2.66667	0.405465	0.666667	0.648211	0.000340614	2.59284
		4.5	2.76923	0.485508	0.615385	0.606921	7.16292e-05	2.73115
		5	2.85714	0.559616	0.571429	0.572998	2.46307e-06	2.86499
		5.5	2.93333	0.628609	0.533333	0.544687	0.000128908	2.99578
		6	3	0.693147	0.5	0.520738	0.00043008	3.12443
		6.5	3.05882	0.753772	0.470588	0.50024	0.000879231	3.25156
		7	3.11111	0.81093	0.444444	0.482513	0.00144923	3.37759
		7.5	3.15789	0.864997	0.421053	0.467043	0.00211511	3.50282
						SSE	0.0187648
						SSE is the sum of errors squared
